# Supplementary material for: Using multiple sampling strategies to estimate SARS-CoV-2 epidemiological parameters from genomic sequencing data
Source: PubMed Central journal article supplement (PMC9508174; doi:10.1038/s41467-022-32812-0), 2022-09-23
Supplement: 41467_2022_32812_MOESM1_ESM.pdf [file 41467_2022_32812_MOESM1_ESM.pdf]

## Supplementary Figures and Tables

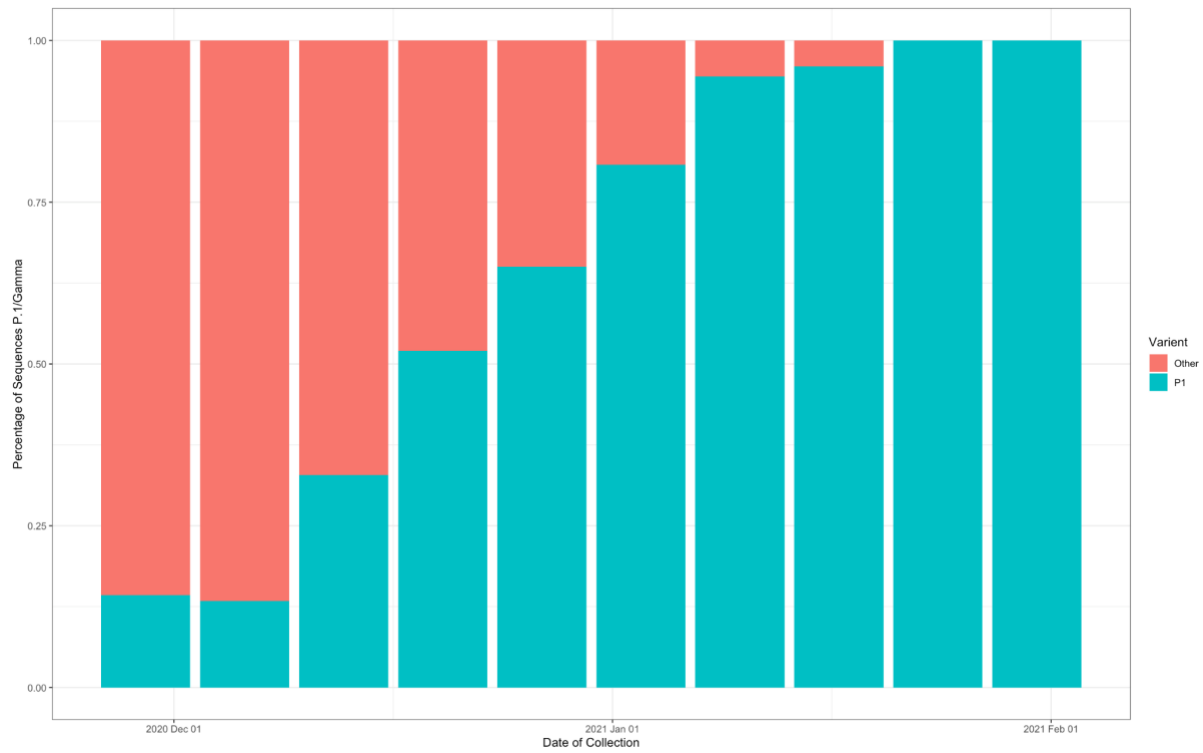

**Supplementary Figure 1:** The proportion of P.1 sequences compared to non-P.1 sequences from Amazonas State, Brazil found on GISAID (Shu and McCauley, 2017).

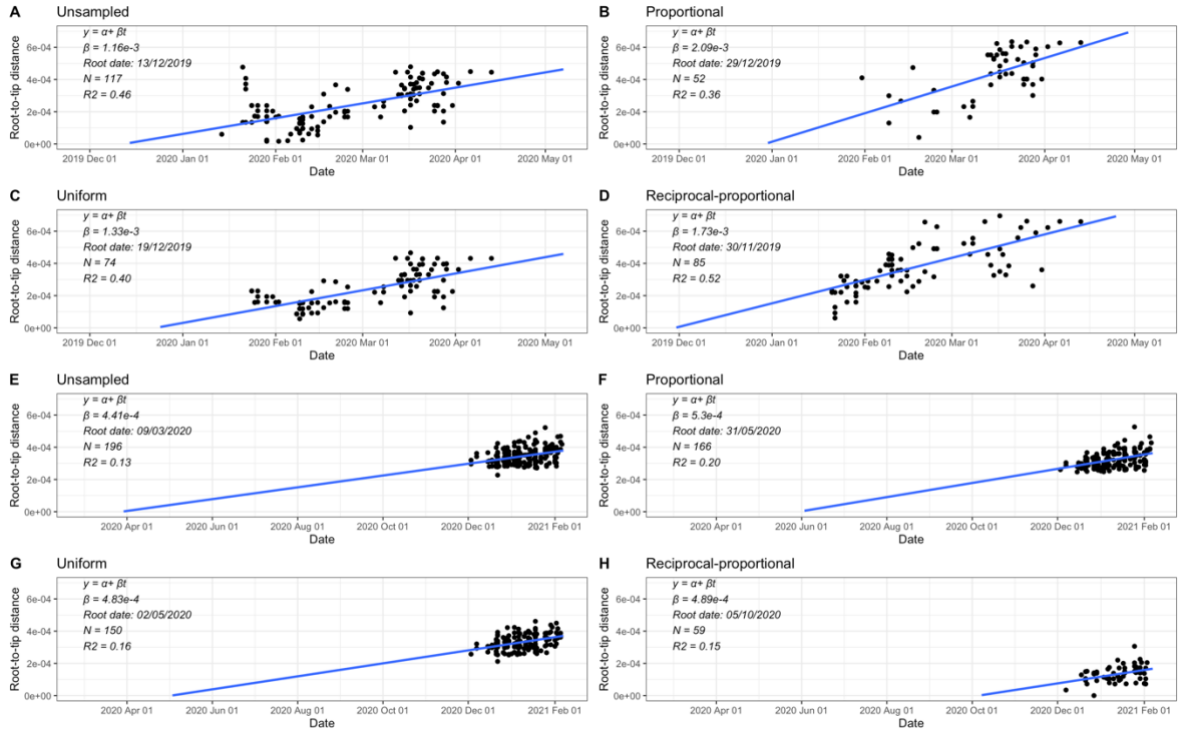

**Supplementary Figure 2:** Root-to-tip genetic distances to sample collection dates for the SARS-CoV-2 genome datasets used in this study: A-D represents Hong Kong and E-H represent Amazonas State. Plots are based on the maximum likelihood trees rooted by maximising  $R^2$ . The linear regression trend lines are shown to data points, corresponding to the genome sequences (represented with black dots).

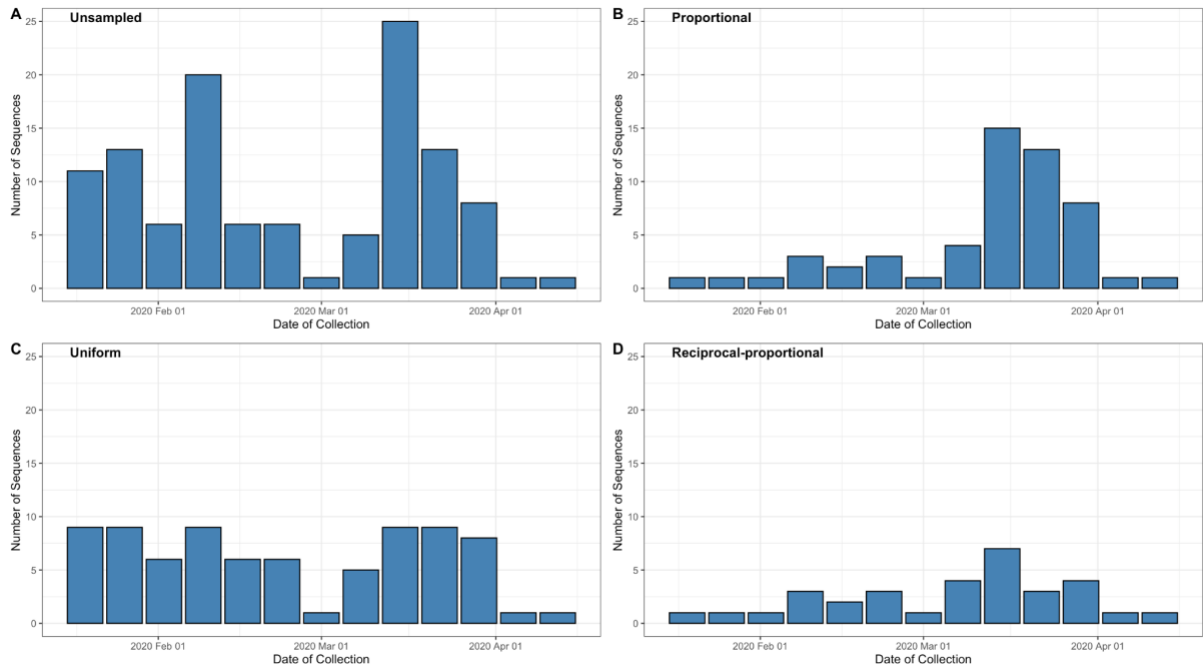

**Supplementary Figure 3:** Number of sequences for each week and sampling scheme for Hong Kong dataset.

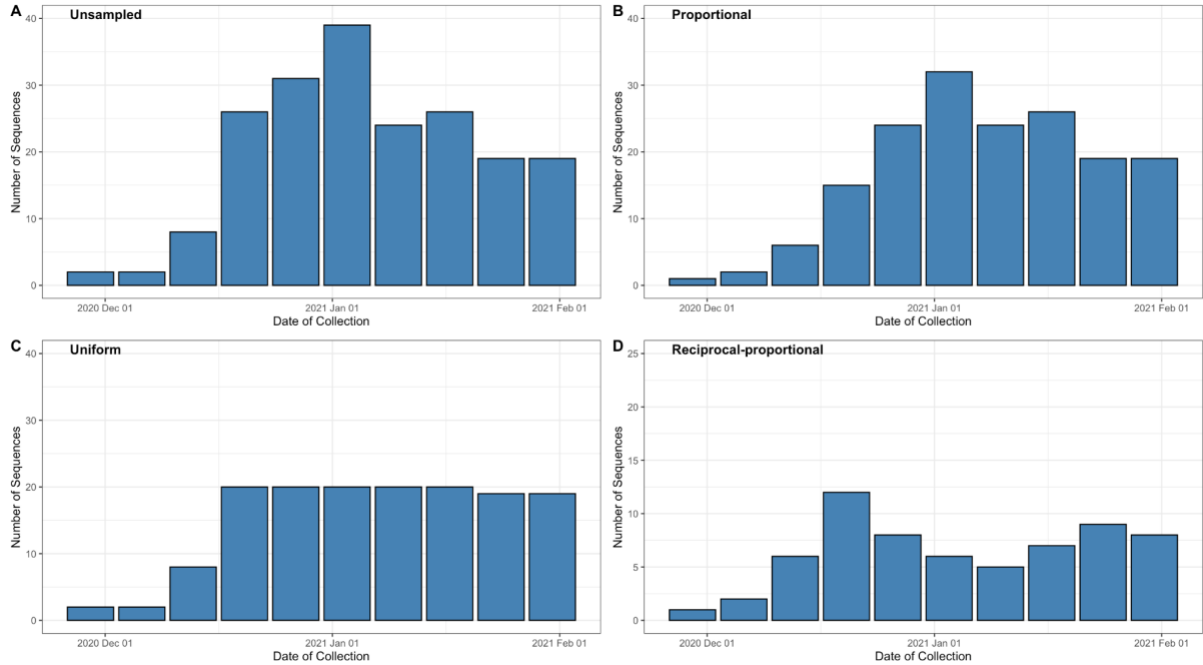

**Supplementary Figure 4:** Number of sequences for each week and sampling scheme for Amazonas dataset.

**Supplementary Table 1:** TMRCA and mean substitution rate both with 95% BCI for each sampling strategy for Hong Kong and Amazonas datasets alongside the Jensen-Shannon distance. Full posterior distribution of the TMRCA and substitution rates obtained under the different sampling strategies can be found in Figure 3B and D and Supplementary Figure 5.

| <b>Sampling Strategy</b> | <b>Dataset</b> | <b>TMRCA (95% BCI)</b>                                                                          | <b>Mean Substitution Rate (95% BCI, subs/site/year, s/s/y)</b>            |
|--------------------------|----------------|-------------------------------------------------------------------------------------------------|---------------------------------------------------------------------------|
| Unsampled                | Hong Kong      | 2 <sup>nd</sup> December 2019 (10 <sup>th</sup> November 2019 – 24 <sup>th</sup> December 2019) | 1.12x10 <sup>-3</sup><br>(9.16x10 <sup>-4</sup> – 1.35x10 <sup>-3</sup> ) |
|                          | Brazil         | 30 <sup>th</sup> October 2020 (8 <sup>th</sup> October 2020 – 13 <sup>th</sup> December 2020)   | 4.58x10 <sup>-4</sup><br>(3.69x10 <sup>-4</sup> – 5.56x10 <sup>-4</sup> ) |
| Proportional             | Hong Kong      | 24 <sup>th</sup> December 2019 (21 <sup>st</sup> November 2019 – 11 <sup>th</sup> January 2020) | 1.39x10 <sup>-3</sup><br>(9.28x10 <sup>-4</sup> – 2.48x10 <sup>-3</sup> ) |
|                          | Brazil         | 30 <sup>th</sup> October 2020 (25 <sup>th</sup> August 2020 – 29 <sup>th</sup> November 2020)   | 4.60x10 <sup>-4</sup><br>(3.70x10 <sup>-4</sup> – 5.56x10 <sup>-4</sup> ) |
| Uniform                  | Hong Kong      | 13 <sup>th</sup> December 2019 (18 <sup>th</sup> November 2019 – 4 <sup>th</sup> January 2020)  | 1.64x10 <sup>-3</sup><br>(1.22x10 <sup>-3</sup> – 2.09x10 <sup>-3</sup> ) |

|                         |           |                                                                                                  |                                                                            |
|-------------------------|-----------|--------------------------------------------------------------------------------------------------|----------------------------------------------------------------------------|
|                         | Brazil    | 27 <sup>th</sup> October 2020 (5 <sup>th</sup> October 2020 – 25 <sup>th</sup> November 2020)    | $4.60 \times 10^{-4}$<br>( $3.70 \times 10^{-4}$ – $5.56 \times 10^{-4}$ ) |
| Reciprocal-proportional | Hong Kong | 6 <sup>th</sup> December 2019 (10 <sup>th</sup> November 2019 – 28 <sup>th</sup> December 2019)  | $1.30 \times 10^{-3}$<br>( $1.03 \times 10^{-3}$ – $1.59 \times 10^{-3}$ ) |
|                         | Brazil    | 30 <sup>th</sup> October 2020 (27 <sup>th</sup> September 2020 – 25 <sup>th</sup> November 2020) | $4.00 \times 10^{-4}$<br>( $2.56 \times 10^{-4}$ – $5.55 \times 10^{-4}$ ) |

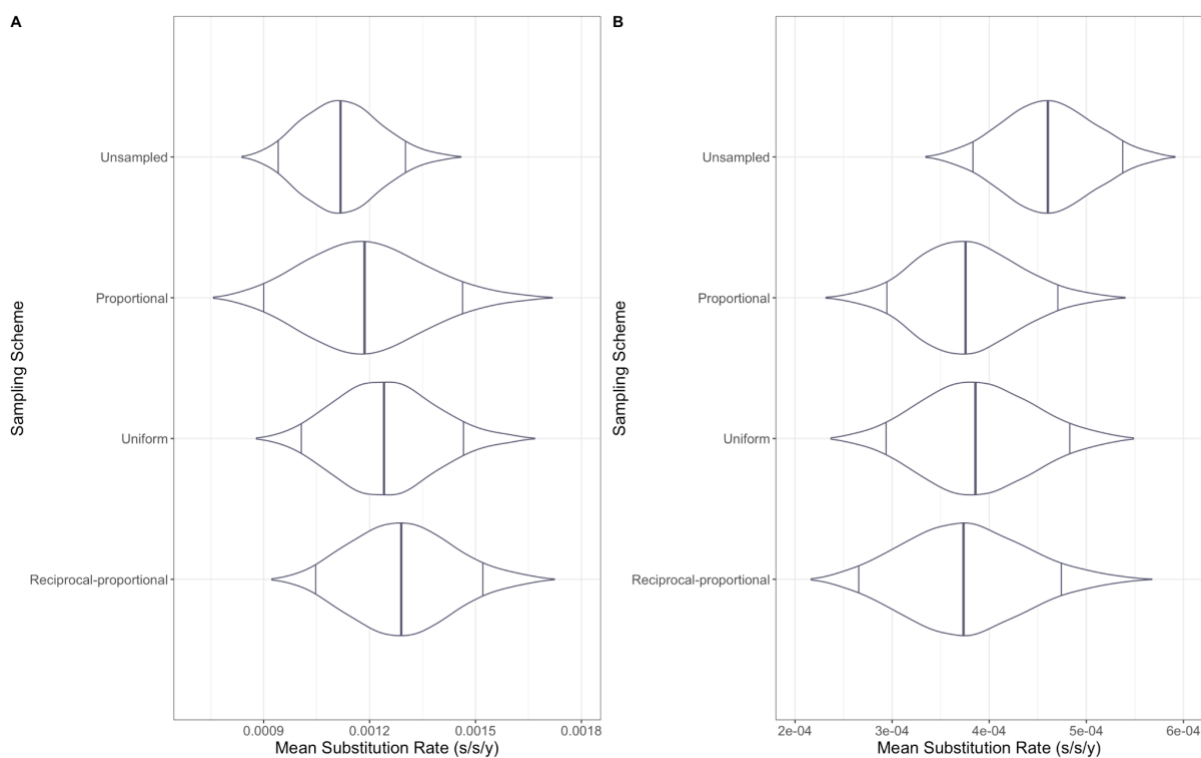

**Supplementary Figure 5:** Mean substitution rate (s/s/y) for Hong Kong and Brazil. Figure 1A represents Hong Kong with Figure 1B representing the Amazonas. The central line represents the posterior mean and with intervals representing 95% Highest Posterior Density Interval

**Supplementary Table 2:** Accession ID of each Hong Kong sequence for each sampling strategy used within this study

| <b>Unsampled</b> | <b>Proportional</b> | <b>Uniform</b>  | <b>Reciprocal-proportional</b> |
|------------------|---------------------|-----------------|--------------------------------|
| EPI_ISL_ 412028  | EPI_ISL_ 414517     | EPI_ISL_ 412029 | EPI_ISL_ 412028                |
| EPI_ISL_ 412029  | EPI_ISL_ 414519     | EPI_ISL_ 414517 | EPI_ISL_ 412029                |
| EPI_ISL_ 412030  | EPI_ISL_ 414527     | EPI_ISL_ 414519 | EPI_ISL_ 412030                |
| EPI_ISL_ 414517  | EPI_ISL_ 418815     | EPI_ISL_ 414527 | EPI_ISL_ 414517                |
| EPI_ISL_ 414519  | EPI_ISL_ 419224     | EPI_ISL_ 414569 | EPI_ISL_ 414519                |
| EPI_ISL_ 414527  | EPI_ISL_ 419229     | EPI_ISL_ 414571 | EPI_ISL_ 414527                |
| EPI_ISL_ 414528  | EPI_ISL_ 419232     | EPI_ISL_ 416314 | EPI_ISL_ 414528                |
| EPI_ISL_ 414569  | EPI_ISL_ 450404     | EPI_ISL_ 417064 | EPI_ISL_ 414569                |
| EPI_ISL_ 414571  | EPI_ISL_ 450405     | EPI_ISL_ 417443 | EPI_ISL_ 414571                |
| EPI_ISL_ 416314  | EPI_ISL_ 450410     | EPI_ISL_ 419214 | EPI_ISL_ 416314                |
| EPI_ISL_ 417064  | EPI_ISL_ 476801     | EPI_ISL_ 419215 | EPI_ISL_ 417064                |
| EPI_ISL_ 417176  | EPI_ISL_ 476802     | EPI_ISL_ 419217 | EPI_ISL_ 417176                |
| EPI_ISL_ 417178  | EPI_ISL_ 476803     | EPI_ISL_ 419224 | EPI_ISL_ 417178                |
| EPI_ISL_ 417181  | EPI_ISL_ 497769     | EPI_ISL_ 419225 | EPI_ISL_ 417181                |
| EPI_ISL_ 417185  | EPI_ISL_ 497773     | EPI_ISL_ 419227 | EPI_ISL_ 417185                |
| EPI_ISL_ 417187  | EPI_ISL_ 497775     | EPI_ISL_ 419228 | EPI_ISL_ 417187                |
| EPI_ISL_ 417188  | EPI_ISL_ 497784     | EPI_ISL_ 419229 | EPI_ISL_ 417188                |
| EPI_ISL_ 417193  | EPI_ISL_ 497786     | EPI_ISL_ 419231 | EPI_ISL_ 417193                |
| EPI_ISL_ 417197  | EPI_ISL_ 497791     | EPI_ISL_ 419232 | EPI_ISL_ 417197                |
| EPI_ISL_ 417443  | EPI_ISL_ 497796     | EPI_ISL_ 419245 | EPI_ISL_ 417443                |
| EPI_ISL_ 418815  | EPI_ISL_ 497799     | EPI_ISL_ 419247 | EPI_ISL_ 418815                |
| EPI_ISL_ 419214  | EPI_ISL_ 497806     | EPI_ISL_ 419250 | EPI_ISL_ 419214                |
| EPI_ISL_ 419215  | EPI_ISL_ 497808     | EPI_ISL_ 419252 | EPI_ISL_ 419215                |
| EPI_ISL_ 419216  | EPI_ISL_ 497810     | EPI_ISL_ 434564 | EPI_ISL_ 419216                |
| EPI_ISL_ 419217  | EPI_ISL_ 497811     | EPI_ISL_ 434565 | EPI_ISL_ 419217                |
| EPI_ISL_ 419219  | EPI_ISL_ 497818     | EPI_ISL_ 434567 | EPI_ISL_ 419219                |
| EPI_ISL_ 419221  | EPI_ISL_ 497819     | EPI_ISL_ 434568 | EPI_ISL_ 419221                |
| EPI_ISL_ 419222  | EPI_ISL_ 497821     | EPI_ISL_ 434569 | EPI_ISL_ 419222                |
| EPI_ISL_ 419224  | EPI_ISL_ 497823     | EPI_ISL_ 434570 | EPI_ISL_ 419224                |

|                 |                 |                 |                 |
|-----------------|-----------------|-----------------|-----------------|
| EPI_ISL_ 419225 | EPI_ISL_ 497824 | EPI_ISL_ 434571 | EPI_ISL_ 419225 |
| EPI_ISL_ 419226 | EPI_ISL_ 497840 | EPI_ISL_ 450405 | EPI_ISL_ 419226 |
| EPI_ISL_ 419227 | EPI_ISL_ 497845 | EPI_ISL_ 450408 | EPI_ISL_ 419227 |
| EPI_ISL_ 419228 | EPI_ISL_ 497846 | EPI_ISL_ 450409 | EPI_ISL_ 419228 |
| EPI_ISL_ 419229 | EPI_ISL_ 497847 | EPI_ISL_ 450410 | EPI_ISL_ 419229 |
| EPI_ISL_ 419231 | EPI_ISL_ 497850 | EPI_ISL_ 450411 | EPI_ISL_ 419231 |
| EPI_ISL_ 419232 | EPI_ISL_ 497856 | EPI_ISL_ 476801 | EPI_ISL_ 419232 |
| EPI_ISL_ 419245 | EPI_ISL_ 497865 | EPI_ISL_ 476802 | EPI_ISL_ 419245 |
| EPI_ISL_ 419247 | EPI_ISL_ 497870 | EPI_ISL_ 476804 | EPI_ISL_ 419247 |
| EPI_ISL_ 419250 | EPI_ISL_ 516798 | EPI_ISL_ 497769 | EPI_ISL_ 419250 |
| EPI_ISL_ 419252 | EPI_ISL_ 539820 | EPI_ISL_ 497771 | EPI_ISL_ 419252 |
| EPI_ISL_ 434560 | EPI_ISL_ 539850 | EPI_ISL_ 497783 | EPI_ISL_ 434563 |
| EPI_ISL_ 434563 | EPI_ISL_ 539851 | EPI_ISL_ 497784 | EPI_ISL_ 434564 |
| EPI_ISL_ 434564 | EPI_ISL_ 610167 | EPI_ISL_ 497791 | EPI_ISL_ 434565 |
| EPI_ISL_ 434565 | EPI_ISL_ 610168 | EPI_ISL_ 497806 | EPI_ISL_ 434566 |
| EPI_ISL_ 434566 | EPI_ISL_ 610169 | EPI_ISL_ 497810 | EPI_ISL_ 434567 |
| EPI_ISL_ 434567 | EPI_ISL_ 610170 | EPI_ISL_ 497811 | EPI_ISL_ 434568 |
| EPI_ISL_ 434568 | EPI_ISL_ 610171 | EPI_ISL_ 497813 | EPI_ISL_ 434569 |
| EPI_ISL_ 434569 | EPI_ISL_ 610172 | EPI_ISL_ 497818 | EPI_ISL_ 434570 |
| EPI_ISL_ 434570 | EPI_ISL_ 610173 | EPI_ISL_ 497821 | EPI_ISL_ 434571 |
| EPI_ISL_ 434571 | EPI_ISL_ 610174 | EPI_ISL_ 497823 | EPI_ISL_ 450405 |
| EPI_ISL_ 450404 | EPI_ISL_ 610175 | EPI_ISL_ 497824 | EPI_ISL_ 450408 |
| EPI_ISL_ 450405 | EPI_ISL_ 610177 | EPI_ISL_ 497826 | EPI_ISL_ 450409 |
| EPI_ISL_ 450408 |                 | EPI_ISL_ 497827 | EPI_ISL_ 450410 |
| EPI_ISL_ 450409 |                 | EPI_ISL_ 497831 | EPI_ISL_ 450411 |
| EPI_ISL_ 450410 |                 | EPI_ISL_ 497832 | EPI_ISL_ 450412 |
| EPI_ISL_ 450411 |                 | EPI_ISL_ 497846 | EPI_ISL_ 476802 |
| EPI_ISL_ 450412 |                 | EPI_ISL_ 497847 | EPI_ISL_ 476804 |
| EPI_ISL_ 476801 |                 | EPI_ISL_ 497848 | EPI_ISL_ 497769 |
| EPI_ISL_ 476802 |                 | EPI_ISL_ 497856 | EPI_ISL_ 497771 |
| EPI_ISL_ 476803 |                 | EPI_ISL_ 497860 | EPI_ISL_ 497773 |

|                 |  |                 |                 |
|-----------------|--|-----------------|-----------------|
| EPI_ISL_ 476804 |  | EPI_ISL_ 497865 | EPI_ISL_ 497783 |
| EPI_ISL_ 497769 |  | EPI_ISL_ 539820 | EPI_ISL_ 497784 |
| EPI_ISL_ 497771 |  | EPI_ISL_ 539850 | EPI_ISL_ 497791 |
| EPI_ISL_ 497773 |  | EPI_ISL_ 539851 | EPI_ISL_ 497797 |
| EPI_ISL_ 497775 |  | EPI_ISL_ 610165 | EPI_ISL_ 497811 |
| EPI_ISL_ 497783 |  | EPI_ISL_ 610166 | EPI_ISL_ 497812 |
| EPI_ISL_ 497784 |  | EPI_ISL_ 610167 | EPI_ISL_ 497818 |
| EPI_ISL_ 497786 |  | EPI_ISL_ 610168 | EPI_ISL_ 497819 |
| EPI_ISL_ 497791 |  | EPI_ISL_ 610169 | EPI_ISL_ 497823 |
| EPI_ISL_ 497796 |  | EPI_ISL_ 610171 | EPI_ISL_ 497824 |
| EPI_ISL_ 497797 |  | EPI_ISL_ 610173 | EPI_ISL_ 497827 |
| EPI_ISL_ 497798 |  | EPI_ISL_ 610174 | EPI_ISL_ 497831 |
| EPI_ISL_ 497799 |  | EPI_ISL_ 610175 | EPI_ISL_ 497833 |
| EPI_ISL_ 497806 |  | EPI_ISL_ 610177 | EPI_ISL_ 497848 |
| EPI_ISL_ 497808 |  |                 | EPI_ISL_ 497850 |
| EPI_ISL_ 497810 |  |                 | EPI_ISL_ 497856 |
| EPI_ISL_ 497811 |  |                 | EPI_ISL_ 497860 |
| EPI_ISL_ 497812 |  |                 | EPI_ISL_ 497864 |
| EPI_ISL_ 497813 |  |                 | EPI_ISL_ 497865 |
| EPI_ISL_ 497818 |  |                 | EPI_ISL_ 539850 |
| EPI_ISL_ 497819 |  |                 | EPI_ISL_ 539851 |
| EPI_ISL_ 497820 |  |                 | EPI_ISL_ 610165 |
| EPI_ISL_ 497821 |  |                 | EPI_ISL_ 610166 |
| EPI_ISL_ 497823 |  |                 | EPI_ISL_ 610172 |
| EPI_ISL_ 497824 |  |                 | EPI_ISL_ 610177 |
| EPI_ISL_ 497826 |  |                 |                 |
| EPI_ISL_ 497827 |  |                 |                 |
| EPI_ISL_ 497831 |  |                 |                 |



|                 |  |  |  |
|-----------------|--|--|--|
| EPI_ISL_ 497832 |  |  |  |
| EPI_ISL_ 497833 |  |  |  |
| EPI_ISL_ 497840 |  |  |  |
| EPI_ISL_ 497845 |  |  |  |
| EPI_ISL_ 497846 |  |  |  |
| EPI_ISL_ 497847 |  |  |  |
| EPI_ISL_ 497848 |  |  |  |
| EPI_ISL_ 497850 |  |  |  |
| EPI_ISL_ 497856 |  |  |  |
| EPI_ISL_ 497860 |  |  |  |
| EPI_ISL_ 497864 |  |  |  |
| EPI_ISL_ 497865 |  |  |  |
| EPI_ISL_ 497870 |  |  |  |
| EPI_ISL_ 516798 |  |  |  |
| EPI_ISL_ 539820 |  |  |  |
| EPI_ISL_ 539850 |  |  |  |
| EPI_ISL_ 539851 |  |  |  |
| EPI_ISL_ 610165 |  |  |  |
| EPI_ISL_ 610166 |  |  |  |
| EPI_ISL_ 610167 |  |  |  |
| EPI_ISL_ 610168 |  |  |  |
| EPI_ISL_ 610169 |  |  |  |
| EPI_ISL_ 610170 |  |  |  |
| EPI_ISL_ 610171 |  |  |  |
| EPI_ISL_ 610172 |  |  |  |
| EPI_ISL_ 610173 |  |  |  |
| EPI_ISL_ 610174 |  |  |  |
| EPI_ISL_ 610175 |  |  |  |

|                 |  |  |  |
|-----------------|--|--|--|
| EPI_ISL_ 610177 |  |  |  |
|-----------------|--|--|--|

**Supplementary Table 3:** Accession ID of each Amazonas State, Brazil sequence for each sampling strategy used within this study

| <b>Unsampled</b> | <b>Proportional</b> | <b>Uniform</b>   | <b>Reciprocal-proportional</b> |
|------------------|---------------------|------------------|--------------------------------|
| EPI_ISL_ 1034306 | EPI_ISL_ 1034304    | EPI_ISL_ 1034304 | EPI_ISL_ 1034306               |
| EPI_ISL_ 1060876 | EPI_ISL_ 1034306    | EPI_ISL_ 1034306 | EPI_ISL_ 1060913               |
| EPI_ISL_ 1060877 | EPI_ISL_ 1060877    | EPI_ISL_ 1060877 | EPI_ISL_ 1060914               |
| EPI_ISL_ 1060881 | EPI_ISL_ 1060881    | EPI_ISL_ 1060881 | EPI_ISL_ 1068149               |
| EPI_ISL_ 1060888 | EPI_ISL_ 1060897    | EPI_ISL_ 1060888 | EPI_ISL_ 1068150               |
| EPI_ISL_ 1060889 | EPI_ISL_ 1060900    | EPI_ISL_ 1060889 | EPI_ISL_ 1068156               |
| EPI_ISL_ 1060894 | EPI_ISL_ 1060902    | EPI_ISL_ 1060897 | EPI_ISL_ 1068198               |
| EPI_ISL_ 1060897 | EPI_ISL_ 1060904    | EPI_ISL_ 1060900 | EPI_ISL_ 1068258               |
| EPI_ISL_ 1060900 | EPI_ISL_ 1060906    | EPI_ISL_ 1060912 | EPI_ISL_ 1068260               |
| EPI_ISL_ 1060902 | EPI_ISL_ 1060912    | EPI_ISL_ 1060913 | EPI_ISL_ 1068262               |
| EPI_ISL_ 1060904 | EPI_ISL_ 1060913    | EPI_ISL_ 1060956 | EPI_ISL_ 1068263               |
| EPI_ISL_ 1060906 | EPI_ISL_ 1060914    | EPI_ISL_ 1061026 | EPI_ISL_ 1068264               |
| EPI_ISL_ 1060911 | EPI_ISL_ 1060918    | EPI_ISL_ 1068111 | EPI_ISL_ 1068278               |
| EPI_ISL_ 1060912 | EPI_ISL_ 1060956    | EPI_ISL_ 1068149 | EPI_ISL_ 1068286               |
| EPI_ISL_ 1060913 | EPI_ISL_ 1061026    | EPI_ISL_ 1068150 | EPI_ISL_ 1068288               |
| EPI_ISL_ 1060914 | EPI_ISL_ 1068110    | EPI_ISL_ 1068154 | EPI_ISL_ 1166615               |
| EPI_ISL_ 1060918 | EPI_ISL_ 1068111    | EPI_ISL_ 1068158 | EPI_ISL_ 1213190               |
| EPI_ISL_ 1060956 | EPI_ISL_ 1068112    | EPI_ISL_ 1068160 | EPI_ISL_ 1261690               |
| EPI_ISL_ 1061026 | EPI_ISL_ 1068114    | EPI_ISL_ 1068169 | EPI_ISL_ 1261694               |
| EPI_ISL_ 1068110 | EPI_ISL_ 1068149    | EPI_ISL_ 1068198 | EPI_ISL_ 2777236               |
| EPI_ISL_ 1068111 | EPI_ISL_ 1068150    | EPI_ISL_ 1068222 | EPI_ISL_ 2777320               |
| EPI_ISL_ 1068112 | EPI_ISL_ 1068151    | EPI_ISL_ 1068225 | EPI_ISL_ 2777363               |
| EPI_ISL_ 1068114 | EPI_ISL_ 1068154    | EPI_ISL_ 1068226 | EPI_ISL_ 2777375               |
| EPI_ISL_ 1068149 | EPI_ISL_ 1068156    | EPI_ISL_ 1068243 | EPI_ISL_ 2777376               |
| EPI_ISL_ 1068150 | EPI_ISL_ 1068158    | EPI_ISL_ 1068248 | EPI_ISL_ 2777384               |
| EPI_ISL_ 1068151 | EPI_ISL_ 1068160    | EPI_ISL_ 1068249 | EPI_ISL_ 2777388               |
| EPI_ISL_ 1068154 | EPI_ISL_ 1068169    | EPI_ISL_ 1068260 | EPI_ISL_ 2777397               |

|                  |                  |                  |                  |
|------------------|------------------|------------------|------------------|
| EPI_ISL_ 1068156 | EPI_ISL_ 1068198 | EPI_ISL_ 1068261 | EPI_ISL_ 2777399 |
| EPI_ISL_ 1068158 | EPI_ISL_ 1068221 | EPI_ISL_ 1068262 | EPI_ISL_ 2777401 |
| EPI_ISL_ 1068160 | EPI_ISL_ 1068222 | EPI_ISL_ 1068263 | EPI_ISL_ 2777403 |
| EPI_ISL_ 1068169 | EPI_ISL_ 1068225 | EPI_ISL_ 1068264 | EPI_ISL_ 2777404 |
| EPI_ISL_ 1068198 | EPI_ISL_ 1068248 | EPI_ISL_ 1068266 | EPI_ISL_ 2777409 |
| EPI_ISL_ 1068221 | EPI_ISL_ 1068249 | EPI_ISL_ 1068268 | EPI_ISL_ 2777410 |
| EPI_ISL_ 1068222 | EPI_ISL_ 1068258 | EPI_ISL_ 1068269 | EPI_ISL_ 2777414 |
| EPI_ISL_ 1068225 | EPI_ISL_ 1068260 | EPI_ISL_ 1068270 | EPI_ISL_ 2777415 |
| EPI_ISL_ 1068226 | EPI_ISL_ 1068261 | EPI_ISL_ 1068271 | EPI_ISL_ 2777465 |
| EPI_ISL_ 1068243 | EPI_ISL_ 1068262 | EPI_ISL_ 1068272 | EPI_ISL_ 2777466 |
| EPI_ISL_ 1068248 | EPI_ISL_ 1068263 | EPI_ISL_ 1068273 | EPI_ISL_ 2777467 |
| EPI_ISL_ 1068249 | EPI_ISL_ 1068264 | EPI_ISL_ 1068274 | EPI_ISL_ 2777469 |
| EPI_ISL_ 1068258 | EPI_ISL_ 1068266 | EPI_ISL_ 1068279 | EPI_ISL_ 2777470 |
| EPI_ISL_ 1068260 | EPI_ISL_ 1068268 | EPI_ISL_ 1068282 | EPI_ISL_ 2777472 |
| EPI_ISL_ 1068261 | EPI_ISL_ 1068269 | EPI_ISL_ 1068283 | EPI_ISL_ 2777473 |
| EPI_ISL_ 1068262 | EPI_ISL_ 1068270 | EPI_ISL_ 1068284 | EPI_ISL_ 2777474 |
| EPI_ISL_ 1068263 | EPI_ISL_ 1068271 | EPI_ISL_ 1068285 | EPI_ISL_ 2777475 |
| EPI_ISL_ 1068264 | EPI_ISL_ 1068272 | EPI_ISL_ 1068286 | EPI_ISL_ 2777482 |
| EPI_ISL_ 1068266 | EPI_ISL_ 1068273 | EPI_ISL_ 1068287 | EPI_ISL_ 2777483 |
| EPI_ISL_ 1068268 | EPI_ISL_ 1068274 | EPI_ISL_ 1068288 | EPI_ISL_ 2777485 |
| EPI_ISL_ 1068269 | EPI_ISL_ 1068275 | EPI_ISL_ 1068290 | EPI_ISL_ 2777503 |
| EPI_ISL_ 1068270 | EPI_ISL_ 1068276 | EPI_ISL_ 1068291 | EPI_ISL_ 2777508 |
| EPI_ISL_ 1068271 | EPI_ISL_ 1068278 | EPI_ISL_ 1068292 | EPI_ISL_ 2777509 |
| EPI_ISL_ 1068272 | EPI_ISL_ 1068279 | EPI_ISL_ 1166615 | EPI_ISL_ 2777516 |
| EPI_ISL_ 1068273 | EPI_ISL_ 1068280 | EPI_ISL_ 1213190 | EPI_ISL_ 2777599 |
| EPI_ISL_ 1068274 | EPI_ISL_ 1068281 | EPI_ISL_ 1213204 | EPI_ISL_ 2777698 |
| EPI_ISL_ 1068275 | EPI_ISL_ 1068282 | EPI_ISL_ 1261683 | EPI_ISL_ 2777986 |
| EPI_ISL_ 1068276 | EPI_ISL_ 1068283 | EPI_ISL_ 1261685 | EPI_ISL_ 2777987 |
| EPI_ISL_ 1068278 | EPI_ISL_ 1068284 | EPI_ISL_ 1261690 | EPI_ISL_ 2777993 |
| EPI_ISL_ 1068279 | EPI_ISL_ 1068285 | EPI_ISL_ 1261694 | EPI_ISL_ 2777999 |
| EPI_ISL_ 1068280 | EPI_ISL_ 1068286 | EPI_ISL_ 2777236 | EPI_ISL_ 2778002 |
| EPI_ISL_ 1068281 | EPI_ISL_ 1068287 | EPI_ISL_ 2777248 | EPI_ISL_ 2778004 |
| EPI_ISL_ 1068282 | EPI_ISL_ 1068288 | EPI_ISL_ 2777249 | EPI_ISL_ 2778005 |

|                  |                  |                  |                 |
|------------------|------------------|------------------|-----------------|
| EPI_ISL_ 1068283 | EPI_ISL_ 1068289 | EPI_ISL_ 2777250 | EPI_ISL_ 833138 |
| EPI_ISL_ 1068284 | EPI_ISL_ 1068290 | EPI_ISL_ 2777320 | EPI_ISL_ 833140 |
| EPI_ISL_ 1068285 | EPI_ISL_ 1068291 | EPI_ISL_ 2777363 | EPI_ISL_ 906071 |
| EPI_ISL_ 1068286 | EPI_ISL_ 1068292 | EPI_ISL_ 2777364 | EPI_ISL_ 918505 |
| EPI_ISL_ 1068287 | EPI_ISL_ 1166615 | EPI_ISL_ 2777373 | EPI_ISL_ 918506 |
| EPI_ISL_ 1068288 | EPI_ISL_ 1213190 | EPI_ISL_ 2777374 | EPI_ISL_ 918508 |
| EPI_ISL_ 1068289 | EPI_ISL_ 1213204 | EPI_ISL_ 2777375 | EPI_ISL_ 918509 |
| EPI_ISL_ 1068290 | EPI_ISL_ 1261683 | EPI_ISL_ 2777376 |                 |
| EPI_ISL_ 1068291 | EPI_ISL_ 1261685 | EPI_ISL_ 2777377 |                 |
| EPI_ISL_ 1068292 | EPI_ISL_ 1261690 | EPI_ISL_ 2777378 |                 |
| EPI_ISL_ 1166615 | EPI_ISL_ 1261694 | EPI_ISL_ 2777380 |                 |
| EPI_ISL_ 1213190 | EPI_ISL_ 2777236 | EPI_ISL_ 2777383 |                 |
| EPI_ISL_ 1213204 | EPI_ISL_ 2777238 | EPI_ISL_ 2777384 |                 |
| EPI_ISL_ 1261683 | EPI_ISL_ 2777248 | EPI_ISL_ 2777385 |                 |
| EPI_ISL_ 1261685 | EPI_ISL_ 2777249 | EPI_ISL_ 2777388 |                 |
| EPI_ISL_ 1261690 | EPI_ISL_ 2777250 | EPI_ISL_ 2777397 |                 |
| EPI_ISL_ 1261694 | EPI_ISL_ 2777251 | EPI_ISL_ 2777398 |                 |
| EPI_ISL_ 2777236 | EPI_ISL_ 2777320 | EPI_ISL_ 2777399 |                 |
| EPI_ISL_ 2777238 | EPI_ISL_ 2777363 | EPI_ISL_ 2777400 |                 |
| EPI_ISL_ 2777248 | EPI_ISL_ 2777364 | EPI_ISL_ 2777401 |                 |
| EPI_ISL_ 2777249 | EPI_ISL_ 2777373 | EPI_ISL_ 2777402 |                 |
| EPI_ISL_ 2777250 | EPI_ISL_ 2777374 | EPI_ISL_ 2777403 |                 |
| EPI_ISL_ 2777251 | EPI_ISL_ 2777375 | EPI_ISL_ 2777404 |                 |
| EPI_ISL_ 2777320 | EPI_ISL_ 2777376 | EPI_ISL_ 2777405 |                 |
| EPI_ISL_ 2777363 | EPI_ISL_ 2777377 | EPI_ISL_ 2777406 |                 |
| EPI_ISL_ 2777364 | EPI_ISL_ 2777378 | EPI_ISL_ 2777407 |                 |
| EPI_ISL_ 2777373 | EPI_ISL_ 2777380 | EPI_ISL_ 2777408 |                 |
| EPI_ISL_ 2777374 | EPI_ISL_ 2777382 | EPI_ISL_ 2777410 |                 |
| EPI_ISL_ 2777375 | EPI_ISL_ 2777383 | EPI_ISL_ 2777412 |                 |
| EPI_ISL_ 2777376 | EPI_ISL_ 2777384 | EPI_ISL_ 2777413 |                 |
| EPI_ISL_ 2777377 | EPI_ISL_ 2777385 | EPI_ISL_ 2777414 |                 |
| EPI_ISL_ 2777378 | EPI_ISL_ 2777388 | EPI_ISL_ 2777415 |                 |
| EPI_ISL_ 2777380 | EPI_ISL_ 2777397 | EPI_ISL_ 2777417 |                 |

|                  |                  |                  |  |
|------------------|------------------|------------------|--|
| EPI_ISL_ 2777382 | EPI_ISL_ 2777398 | EPI_ISL_ 2777418 |  |
| EPI_ISL_ 2777383 | EPI_ISL_ 2777399 | EPI_ISL_ 2777419 |  |
| EPI_ISL_ 2777384 | EPI_ISL_ 2777400 | EPI_ISL_ 2777454 |  |
| EPI_ISL_ 2777385 | EPI_ISL_ 2777401 | EPI_ISL_ 2777461 |  |
| EPI_ISL_ 2777388 | EPI_ISL_ 2777402 | EPI_ISL_ 2777462 |  |
| EPI_ISL_ 2777397 | EPI_ISL_ 2777403 | EPI_ISL_ 2777465 |  |
| EPI_ISL_ 2777398 | EPI_ISL_ 2777404 | EPI_ISL_ 2777466 |  |
| EPI_ISL_ 2777399 | EPI_ISL_ 2777405 | EPI_ISL_ 2777467 |  |
| EPI_ISL_ 2777400 | EPI_ISL_ 2777406 | EPI_ISL_ 2777469 |  |
| EPI_ISL_ 2777401 | EPI_ISL_ 2777407 | EPI_ISL_ 2777470 |  |
| EPI_ISL_ 2777402 | EPI_ISL_ 2777408 | EPI_ISL_ 2777472 |  |
| EPI_ISL_ 2777403 | EPI_ISL_ 2777409 | EPI_ISL_ 2777473 |  |
| EPI_ISL_ 2777404 | EPI_ISL_ 2777410 | EPI_ISL_ 2777474 |  |
| EPI_ISL_ 2777405 | EPI_ISL_ 2777412 | EPI_ISL_ 2777475 |  |
| EPI_ISL_ 2777406 | EPI_ISL_ 2777413 | EPI_ISL_ 2777477 |  |
| EPI_ISL_ 2777407 | EPI_ISL_ 2777414 | EPI_ISL_ 2777478 |  |
| EPI_ISL_ 2777408 | EPI_ISL_ 2777415 | EPI_ISL_ 2777479 |  |
| EPI_ISL_ 2777409 | EPI_ISL_ 2777416 | EPI_ISL_ 2777481 |  |
| EPI_ISL_ 2777410 | EPI_ISL_ 2777417 | EPI_ISL_ 2777482 |  |
| EPI_ISL_ 2777412 | EPI_ISL_ 2777418 | EPI_ISL_ 2777483 |  |
| EPI_ISL_ 2777413 | EPI_ISL_ 2777419 | EPI_ISL_ 2777485 |  |
| EPI_ISL_ 2777414 | EPI_ISL_ 2777420 | EPI_ISL_ 2777495 |  |
| EPI_ISL_ 2777415 | EPI_ISL_ 2777454 | EPI_ISL_ 2777498 |  |
| EPI_ISL_ 2777416 | EPI_ISL_ 2777460 | EPI_ISL_ 2777503 |  |
| EPI_ISL_ 2777417 | EPI_ISL_ 2777461 | EPI_ISL_ 2777507 |  |
| EPI_ISL_ 2777418 | EPI_ISL_ 2777462 | EPI_ISL_ 2777508 |  |
| EPI_ISL_ 2777419 | EPI_ISL_ 2777464 | EPI_ISL_ 2777539 |  |
| EPI_ISL_ 2777420 | EPI_ISL_ 2777466 | EPI_ISL_ 2777599 |  |
| EPI_ISL_ 2777454 | EPI_ISL_ 2777467 | EPI_ISL_ 2777698 |  |
| EPI_ISL_ 2777460 | EPI_ISL_ 2777468 | EPI_ISL_ 2777700 |  |
| EPI_ISL_ 2777461 | EPI_ISL_ 2777469 | EPI_ISL_ 2777701 |  |
| EPI_ISL_ 2777462 | EPI_ISL_ 2777470 | EPI_ISL_ 2777740 |  |
| EPI_ISL_ 2777464 | EPI_ISL_ 2777472 | EPI_ISL_ 2777986 |  |

|                  |                  |                  |  |
|------------------|------------------|------------------|--|
| EPI_ISL_ 2777465 | EPI_ISL_ 2777473 | EPI_ISL_ 2777987 |  |
| EPI_ISL_ 2777466 | EPI_ISL_ 2777475 | EPI_ISL_ 2777993 |  |
| EPI_ISL_ 2777467 | EPI_ISL_ 2777477 | EPI_ISL_ 2777995 |  |
| EPI_ISL_ 2777468 | EPI_ISL_ 2777478 | EPI_ISL_ 2777996 |  |
| EPI_ISL_ 2777469 | EPI_ISL_ 2777481 | EPI_ISL_ 2777997 |  |
| EPI_ISL_ 2777470 | EPI_ISL_ 2777482 | EPI_ISL_ 2777998 |  |
| EPI_ISL_ 2777471 | EPI_ISL_ 2777495 | EPI_ISL_ 2777999 |  |
| EPI_ISL_ 2777472 | EPI_ISL_ 2777498 | EPI_ISL_ 2778000 |  |
| EPI_ISL_ 2777473 | EPI_ISL_ 2777499 | EPI_ISL_ 2778002 |  |
| EPI_ISL_ 2777474 | EPI_ISL_ 2777503 | EPI_ISL_ 2778005 |  |
| EPI_ISL_ 2777475 | EPI_ISL_ 2777508 | EPI_ISL_ 811149  |  |
| EPI_ISL_ 2777477 | EPI_ISL_ 2777516 | EPI_ISL_ 833136  |  |
| EPI_ISL_ 2777478 | EPI_ISL_ 2777539 | EPI_ISL_ 833139  |  |
| EPI_ISL_ 2777479 | EPI_ISL_ 2777698 | EPI_ISL_ 833140  |  |
| EPI_ISL_ 2777481 | EPI_ISL_ 2777701 | EPI_ISL_ 906071  |  |
| EPI_ISL_ 2777482 | EPI_ISL_ 2777740 | EPI_ISL_ 906077  |  |
| EPI_ISL_ 2777483 | EPI_ISL_ 2777986 | EPI_ISL_ 906081  |  |
| EPI_ISL_ 2777484 | EPI_ISL_ 2777987 | EPI_ISL_ 918500  |  |
| EPI_ISL_ 2777485 | EPI_ISL_ 2777995 | EPI_ISL_ 918502  |  |
| EPI_ISL_ 2777495 | EPI_ISL_ 2777996 | EPI_ISL_ 918503  |  |
| EPI_ISL_ 2777498 | EPI_ISL_ 2777997 | EPI_ISL_ 918506  |  |
| EPI_ISL_ 2777499 | EPI_ISL_ 2777998 | EPI_ISL_ 918508  |  |
| EPI_ISL_ 2777503 | EPI_ISL_ 2778002 | EPI_ISL_ 918509  |  |
| EPI_ISL_ 2777507 | EPI_ISL_ 2778005 | EPI_ISL_ 918511  |  |
| EPI_ISL_ 2777508 | EPI_ISL_ 811149  |                  |  |
| EPI_ISL_ 2777509 | EPI_ISL_ 833136  |                  |  |
| EPI_ISL_ 2777516 | EPI_ISL_ 833138  |                  |  |
| EPI_ISL_ 2777539 | EPI_ISL_ 833139  |                  |  |
| EPI_ISL_ 2777599 | EPI_ISL_ 833140  |                  |  |
| EPI_ISL_ 2777698 | EPI_ISL_ 906071  |                  |  |
| EPI_ISL_ 2777700 | EPI_ISL_ 906080  |                  |  |
| EPI_ISL_ 2777701 | EPI_ISL_ 906081  |                  |  |
| EPI_ISL_ 2777740 | EPI_ISL_ 918500  |                  |  |

|                  |                 |  |  |
|------------------|-----------------|--|--|
| EPI_ISL_ 2777986 | EPI_ISL_ 918501 |  |  |
| EPI_ISL_ 2777987 | EPI_ISL_ 918502 |  |  |
| EPI_ISL_ 2777993 | EPI_ISL_ 918503 |  |  |
| EPI_ISL_ 2777995 | EPI_ISL_ 918505 |  |  |
| EPI_ISL_ 2777996 | EPI_ISL_ 918506 |  |  |
| EPI_ISL_ 2777997 | EPI_ISL_ 918507 |  |  |
| EPI_ISL_ 2777998 | EPI_ISL_ 918508 |  |  |
| EPI_ISL_ 2777999 | EPI_ISL_ 918510 |  |  |
| EPI_ISL_ 2778000 | EPI_ISL_ 918511 |  |  |
| EPI_ISL_ 2778002 |                 |  |  |
| EPI_ISL_ 2778004 |                 |  |  |
| EPI_ISL_ 2778005 |                 |  |  |
| EPI_ISL_ 811149  |                 |  |  |
| EPI_ISL_ 833136  |                 |  |  |
| EPI_ISL_ 833138  |                 |  |  |
| EPI_ISL_ 833139  |                 |  |  |
| EPI_ISL_ 833140  |                 |  |  |
| EPI_ISL_ 906071  |                 |  |  |
| EPI_ISL_ 906075  |                 |  |  |
| EPI_ISL_ 906076  |                 |  |  |
| EPI_ISL_ 906077  |                 |  |  |
| EPI_ISL_ 906080  |                 |  |  |
| EPI_ISL_ 906081  |                 |  |  |
| EPI_ISL_ 918499  |                 |  |  |
| EPI_ISL_ 918500  |                 |  |  |
| EPI_ISL_ 918501  |                 |  |  |
| EPI_ISL_ 918502  |                 |  |  |
| EPI_ISL_ 918503  |                 |  |  |
| EPI_ISL_ 918504  |                 |  |  |
| EPI_ISL_ 918505  |                 |  |  |
| EPI_ISL_ 918506  |                 |  |  |
| EPI_ISL_ 918507  |                 |  |  |
| EPI_ISL_ 918508  |                 |  |  |

|                 |  |  |  |
|-----------------|--|--|--|
| EPI_ISL_ 918509 |  |  |  |
| EPI_ISL_ 918510 |  |  |  |
| EPI_ISL_ 918511 |  |  |  |

**Supplementary Table 4:** GISAID acknowledgement table



We gratefully acknowledge the following Authors from the Originating laboratories responsible for obtaining the specimens, as well as the Submitting laboratories where the genome data were generated and shared via GISAID, on which this research is based.

All Submitters of data may be contacted directly via [www.gisaid.org](http://www.gisaid.org)

Authors are sorted alphabetically.

Acknowledgement EPI\_SET Identifier: EPI\_SET\_220804pn

| Accession ID                                                                                                                                                                                                                                                                                                                                                                                                                                                                                                                                                                                                                                                                                                                                                                                                                                                                                                                                                                                                                                                                                                                                                                                                                                                                                                                                                                                                                                                                                                                                                                                                                                                                                                                                                                                                                                                                                                                                                                                                                                                                                                                                                                                                                                                                                                                                                                                                                                                                                                                                                                                                                                                                                                                                                                                                                                                                                                                                                                                                                                                                                                                                                                                                                                                                                                                                                                                                                                                                                                                                                                                                                                                                                                                                                                                                                                                                                                                                                                                                                                                                                                                                                                                                                                                                                                                                                                                                                                                                                                                                                                                                                                                                                                                                                                                                                                                                                                                                                                                                                                                                                                                                                                                                                                                                                                                                                                                                                                                                                                                                                                                                                                                                                                                                                                                                                                                                                                                                                                                                                                                                                                                                                                                                                                                                                                                                                                                                                                                                                                                                                                                                                                                                                                                                                                                                                                                                                                                                                                                                                                                                                                                                                                                                                                                                                                                                                                                                                                                                                                                                                                                                                                                                                                                                                                                                                                                                                                                                                                                                                                                                                                                                                                                                                                                                                                                                                                                                                                                                                                                                                                                                                                                                                                                                                                                                                                                                                                                                                                                                                                                                                                                                                                                                                                                                                                                                                                                                                                                                                                                                                                                                                                                                                                                                                                                                                                                                                                                                                                                                                                                                                                                                                                                                                                                                                                                                                                                                                                                                                                                                                                                                                                                                                                                                                                                                                                                                                                                                                                                                                                                                                                                                                                                                                                                                                                                                                                                                                                                                                                                                                                                                                                                                                                                                                                                                                                                                                                                                                                                                                                                                                                                                                                                                                                                                                                                                                                                                                                                                                                                                                                                                                                                                                                                                                                                                                                                                                                        | Originating Laboratory                                                                                     | Submitting Laboratory                                                                                                       | Authors                                                                                                                                                                                                                                                                                                                                                                                                                                                                                                  |
|---------------------------------------------------------------------------------------------------------------------------------------------------------------------------------------------------------------------------------------------------------------------------------------------------------------------------------------------------------------------------------------------------------------------------------------------------------------------------------------------------------------------------------------------------------------------------------------------------------------------------------------------------------------------------------------------------------------------------------------------------------------------------------------------------------------------------------------------------------------------------------------------------------------------------------------------------------------------------------------------------------------------------------------------------------------------------------------------------------------------------------------------------------------------------------------------------------------------------------------------------------------------------------------------------------------------------------------------------------------------------------------------------------------------------------------------------------------------------------------------------------------------------------------------------------------------------------------------------------------------------------------------------------------------------------------------------------------------------------------------------------------------------------------------------------------------------------------------------------------------------------------------------------------------------------------------------------------------------------------------------------------------------------------------------------------------------------------------------------------------------------------------------------------------------------------------------------------------------------------------------------------------------------------------------------------------------------------------------------------------------------------------------------------------------------------------------------------------------------------------------------------------------------------------------------------------------------------------------------------------------------------------------------------------------------------------------------------------------------------------------------------------------------------------------------------------------------------------------------------------------------------------------------------------------------------------------------------------------------------------------------------------------------------------------------------------------------------------------------------------------------------------------------------------------------------------------------------------------------------------------------------------------------------------------------------------------------------------------------------------------------------------------------------------------------------------------------------------------------------------------------------------------------------------------------------------------------------------------------------------------------------------------------------------------------------------------------------------------------------------------------------------------------------------------------------------------------------------------------------------------------------------------------------------------------------------------------------------------------------------------------------------------------------------------------------------------------------------------------------------------------------------------------------------------------------------------------------------------------------------------------------------------------------------------------------------------------------------------------------------------------------------------------------------------------------------------------------------------------------------------------------------------------------------------------------------------------------------------------------------------------------------------------------------------------------------------------------------------------------------------------------------------------------------------------------------------------------------------------------------------------------------------------------------------------------------------------------------------------------------------------------------------------------------------------------------------------------------------------------------------------------------------------------------------------------------------------------------------------------------------------------------------------------------------------------------------------------------------------------------------------------------------------------------------------------------------------------------------------------------------------------------------------------------------------------------------------------------------------------------------------------------------------------------------------------------------------------------------------------------------------------------------------------------------------------------------------------------------------------------------------------------------------------------------------------------------------------------------------------------------------------------------------------------------------------------------------------------------------------------------------------------------------------------------------------------------------------------------------------------------------------------------------------------------------------------------------------------------------------------------------------------------------------------------------------------------------------------------------------------------------------------------------------------------------------------------------------------------------------------------------------------------------------------------------------------------------------------------------------------------------------------------------------------------------------------------------------------------------------------------------------------------------------------------------------------------------------------------------------------------------------------------------------------------------------------------------------------------------------------------------------------------------------------------------------------------------------------------------------------------------------------------------------------------------------------------------------------------------------------------------------------------------------------------------------------------------------------------------------------------------------------------------------------------------------------------------------------------------------------------------------------------------------------------------------------------------------------------------------------------------------------------------------------------------------------------------------------------------------------------------------------------------------------------------------------------------------------------------------------------------------------------------------------------------------------------------------------------------------------------------------------------------------------------------------------------------------------------------------------------------------------------------------------------------------------------------------------------------------------------------------------------------------------------------------------------------------------------------------------------------------------------------------------------------------------------------------------------------------------------------------------------------------------------------------------------------------------------------------------------------------------------------------------------------------------------------------------------------------------------------------------------------------------------------------------------------------------------------------------------------------------------------------------------------------------------------------------------------------------------------------------------------------------------------------------------------------------------------------------------------------------------------------------------------------------------------------------------------------------------------------------------------------------------------------------------------------------------------------------------------------------------------------------------------------------------------------------------------------------------------------------------------------------------------------------------------------------------------------------------------------------------------------------------------------------------------------------------------------------------------------------------------------------------------------------------------------------------------------------------------------------------------------------------------------------------------------------------------------------------------------------------------------------------------------------------------------------------------------------------------------------------------------------------------------------------------------------------------------------------------------------------------------------------------------------------------------------------------------------------------------------------------------------------------------------------------------------------------------------------------------------------------------------------------------------------------------------------------------------------------------------------------------------------------------------------------------------------------------------------------------------------------------------------------------------------------------------------------------------------------------------------------------------------------------------------------------------------------------------------------------------------------------------------------------------------------------------------------------------------------------------------------------------------------------------------------------------------------------------------------------------------------------------------------------------------------------------------------------------------------------------------------------------------------------------------------------------------------------------------------------------------------------------------------------------------------------------------------------------------------------------------------------------------------------------------------------------------------------------------------------------------------------------------------------------------------------------------------------------------------------------------------------------------------------------------------------------------------------------------------------------------------------------------------------------------------------------------------------------------------------------------------------------------------------------------------------------------------------------------------------------------------------------------------------------------------------------------------------------------------------------------------------------------------------------------------------------------------------------------------------------------------------------------------------------------------------------------------------------------------------------------------------------------------------------------------------------------------------------------------------------------------------------|------------------------------------------------------------------------------------------------------------|-----------------------------------------------------------------------------------------------------------------------------|----------------------------------------------------------------------------------------------------------------------------------------------------------------------------------------------------------------------------------------------------------------------------------------------------------------------------------------------------------------------------------------------------------------------------------------------------------------------------------------------------------|
| EPI_ISL_1060877, EPI_ISL_1060881, EPI_ISL_1060888, EPI_ISL_1060897, EPI_ISL_1060898, EPI_ISL_1060899, EPI_ISL_1060894, EPI_ISL_1060897, EPI_ISL_1060906, EPI_ISL_1060911, EPI_ISL_1060912, EPI_ISL_1060913, EPI_ISL_1060956, EPI_ISL_1061026                                                                                                                                                                                                                                                                                                                                                                                                                                                                                                                                                                                                                                                                                                                                                                                                                                                                                                                                                                                                                                                                                                                                                                                                                                                                                                                                                                                                                                                                                                                                                                                                                                                                                                                                                                                                                                                                                                                                                                                                                                                                                                                                                                                                                                                                                                                                                                                                                                                                                                                                                                                                                                                                                                                                                                                                                                                                                                                                                                                                                                                                                                                                                                                                                                                                                                                                                                                                                                                                                                                                                                                                                                                                                                                                                                                                                                                                                                                                                                                                                                                                                                                                                                                                                                                                                                                                                                                                                                                                                                                                                                                                                                                                                                                                                                                                                                                                                                                                                                                                                                                                                                                                                                                                                                                                                                                                                                                                                                                                                                                                                                                                                                                                                                                                                                                                                                                                                                                                                                                                                                                                                                                                                                                                                                                                                                                                                                                                                                                                                                                                                                                                                                                                                                                                                                                                                                                                                                                                                                                                                                                                                                                                                                                                                                                                                                                                                                                                                                                                                                                                                                                                                                                                                                                                                                                                                                                                                                                                                                                                                                                                                                                                                                                                                                                                                                                                                                                                                                                                                                                                                                                                                                                                                                                                                                                                                                                                                                                                                                                                                                                                                                                                                                                                                                                                                                                                                                                                                                                                                                                                                                                                                                                                                                                                                                                                                                                                                                                                                                                                                                                                                                                                                                                                                                                                                                                                                                                                                                                                                                                                                                                                                                                                                                                                                                                                                                                                                                                                                                                                                                                                                                                                                                                                                                                                                                                                                                                                                                                                                                                                                                                                                                                                                                                                                                                                                                                                                                                                                                                                                                                                                                                                                                                                                                                                                                                                                                                                                                                                                                                                                                                                                                                                        | see above<br>CDL Laboratorio Santos e Vidal LTDA.<br>DB Diagnosticos do Brasil                             | Instituto de Medicina Tropical de Sao Paulo<br>Instituto de Medicina Tropical de Sao Paulo                                  | Brazil-UK Centre for Arbovirus Discovery Diagnosis Genomics and Epidemiology (CADDE) Genomic Network - Instituto de Medicina Tropical<br>Brazil-UK Centre for Arbovirus Discovery Diagnosis Genomics and Epidemiology (CADDE) Genomic Network - Instituto de Medicina Tropical                                                                                                                                                                                                                           |
| EPI_ISL_417187, EPI_ISL_417188, EPI_ISL_417193, EPI_ISL_417197, EPI_ISL_418815, EPI_ISL_419214, EPI_ISL_419215, EPI_ISL_419216, EPI_ISL_419219, EPI_ISL_419224, EPI_ISL_419225, EPI_ISL_419226, EPI_ISL_419227, EPI_ISL_419228, EPI_ISL_419229, EPI_ISL_419232, EPI_ISL_419245, EPI_ISL_419247, EPI_ISL_419250, EPI_ISL_419252                                                                                                                                                                                                                                                                                                                                                                                                                                                                                                                                                                                                                                                                                                                                                                                                                                                                                                                                                                                                                                                                                                                                                                                                                                                                                                                                                                                                                                                                                                                                                                                                                                                                                                                                                                                                                                                                                                                                                                                                                                                                                                                                                                                                                                                                                                                                                                                                                                                                                                                                                                                                                                                                                                                                                                                                                                                                                                                                                                                                                                                                                                                                                                                                                                                                                                                                                                                                                                                                                                                                                                                                                                                                                                                                                                                                                                                                                                                                                                                                                                                                                                                                                                                                                                                                                                                                                                                                                                                                                                                                                                                                                                                                                                                                                                                                                                                                                                                                                                                                                                                                                                                                                                                                                                                                                                                                                                                                                                                                                                                                                                                                                                                                                                                                                                                                                                                                                                                                                                                                                                                                                                                                                                                                                                                                                                                                                                                                                                                                                                                                                                                                                                                                                                                                                                                                                                                                                                                                                                                                                                                                                                                                                                                                                                                                                                                                                                                                                                                                                                                                                                                                                                                                                                                                                                                                                                                                                                                                                                                                                                                                                                                                                                                                                                                                                                                                                                                                                                                                                                                                                                                                                                                                                                                                                                                                                                                                                                                                                                                                                                                                                                                                                                                                                                                                                                                                                                                                                                                                                                                                                                                                                                                                                                                                                                                                                                                                                                                                                                                                                                                                                                                                                                                                                                                                                                                                                                                                                                                                                                                                                                                                                                                                                                                                                                                                                                                                                                                                                                                                                                                                                                                                                                                                                                                                                                                                                                                                                                                                                                                                                                                                                                                                                                                                                                                                                                                                                                                                                                                                                                                                                                                                                                                                                                                                                                                                                                                                                                                                                                                                                                                      | see above<br>Department of Clinical Pathology, Pamela Youde Nethersole Eastern Hospital                    | Department of Health Technology and Informatics, Faculty of Health and Social Science, The Hong Kong Polytechnic University | Alan Ka-Lun WU; Alex Yat-Man HO; Barry Kin-Chung WONG; David Ho-Keung SHUM; Eugene Yuk-Keung TSO; Gilman Kit-Hang SIU; Hiu-Yin LAO; Kam-Tong YIP; Kam-Tong Yip; Kenneth Siu-Sing LEUNG; Kingsley King-Gee TAM; Kit-Man SIN; Kitty Sau-Chun FUNG; Kwok-Cheung LUNG; Lam-Kwong LEE; Man-Chun CHAN; Ming-Pan CHOI; Miranda Chong-Yee YAU; Raymond Wai-To LIU; Sandy Ka-Yee CHAU; Shea Ping YIP; Tak-Lun QUE; Timothy Ting-Leung NG; Wai-Shing LEUNG; Wing Cheong YAM; Wing-Kin TO; Yuk-Yung NG              |
| EPI_ISL_419231                                                                                                                                                                                                                                                                                                                                                                                                                                                                                                                                                                                                                                                                                                                                                                                                                                                                                                                                                                                                                                                                                                                                                                                                                                                                                                                                                                                                                                                                                                                                                                                                                                                                                                                                                                                                                                                                                                                                                                                                                                                                                                                                                                                                                                                                                                                                                                                                                                                                                                                                                                                                                                                                                                                                                                                                                                                                                                                                                                                                                                                                                                                                                                                                                                                                                                                                                                                                                                                                                                                                                                                                                                                                                                                                                                                                                                                                                                                                                                                                                                                                                                                                                                                                                                                                                                                                                                                                                                                                                                                                                                                                                                                                                                                                                                                                                                                                                                                                                                                                                                                                                                                                                                                                                                                                                                                                                                                                                                                                                                                                                                                                                                                                                                                                                                                                                                                                                                                                                                                                                                                                                                                                                                                                                                                                                                                                                                                                                                                                                                                                                                                                                                                                                                                                                                                                                                                                                                                                                                                                                                                                                                                                                                                                                                                                                                                                                                                                                                                                                                                                                                                                                                                                                                                                                                                                                                                                                                                                                                                                                                                                                                                                                                                                                                                                                                                                                                                                                                                                                                                                                                                                                                                                                                                                                                                                                                                                                                                                                                                                                                                                                                                                                                                                                                                                                                                                                                                                                                                                                                                                                                                                                                                                                                                                                                                                                                                                                                                                                                                                                                                                                                                                                                                                                                                                                                                                                                                                                                                                                                                                                                                                                                                                                                                                                                                                                                                                                                                                                                                                                                                                                                                                                                                                                                                                                                                                                                                                                                                                                                                                                                                                                                                                                                                                                                                                                                                                                                                                                                                                                                                                                                                                                                                                                                                                                                                                                                                                                                                                                                                                                                                                                                                                                                                                                                                                                                                                                                      | Department of Clinical Pathology, Tuen Mun Hospital, 23 Tsing Chung Koon Road, Tuen Mun, N.T.              | Department of Health Technology and Informatics, Faculty of Health and Social Science, The Hong Kong Polytechnic University | Alan Ka-Lun WU; Alex Yat-Man HO; Barry Kin-Chung WONG; David Ho-Keung SHUM; Eugene Yuk-Keung TSO; Gilman Kit-Hang SIU; Hiu-Yin LAO; Kam-Tong YIP; Kam-Tong Yip; Kenneth Siu-Sing LEUNG; Kingsley King-Gee TAM; Kit-Man SIN; Kitty Sau-Chun FUNG; Kwok-Cheung LUNG; Lam-Kwong LEE; Man-Chun CHAN; Ming-Pan CHOI; Miranda Chong-Yee YAU; Raymond Wai-To LIU; Sandy Ka-Yee CHAU; Shea Ping YIP; Tak-Lun QUE; Timothy Ting-Leung NG; Wai-Shing LEUNG; Wing Cheong YAM; Wing-Kin TO; Yuk-Yung NG              |
| EPI_ISL_610165, EPI_ISL_610166, EPI_ISL_610167, EPI_ISL_610168, EPI_ISL_610169, EPI_ISL_610170, EPI_ISL_610171, EPI_ISL_610172, EPI_ISL_610173, EPI_ISL_610174, EPI_ISL_610175, EPI_ISL_610177                                                                                                                                                                                                                                                                                                                                                                                                                                                                                                                                                                                                                                                                                                                                                                                                                                                                                                                                                                                                                                                                                                                                                                                                                                                                                                                                                                                                                                                                                                                                                                                                                                                                                                                                                                                                                                                                                                                                                                                                                                                                                                                                                                                                                                                                                                                                                                                                                                                                                                                                                                                                                                                                                                                                                                                                                                                                                                                                                                                                                                                                                                                                                                                                                                                                                                                                                                                                                                                                                                                                                                                                                                                                                                                                                                                                                                                                                                                                                                                                                                                                                                                                                                                                                                                                                                                                                                                                                                                                                                                                                                                                                                                                                                                                                                                                                                                                                                                                                                                                                                                                                                                                                                                                                                                                                                                                                                                                                                                                                                                                                                                                                                                                                                                                                                                                                                                                                                                                                                                                                                                                                                                                                                                                                                                                                                                                                                                                                                                                                                                                                                                                                                                                                                                                                                                                                                                                                                                                                                                                                                                                                                                                                                                                                                                                                                                                                                                                                                                                                                                                                                                                                                                                                                                                                                                                                                                                                                                                                                                                                                                                                                                                                                                                                                                                                                                                                                                                                                                                                                                                                                                                                                                                                                                                                                                                                                                                                                                                                                                                                                                                                                                                                                                                                                                                                                                                                                                                                                                                                                                                                                                                                                                                                                                                                                                                                                                                                                                                                                                                                                                                                                                                                                                                                                                                                                                                                                                                                                                                                                                                                                                                                                                                                                                                                                                                                                                                                                                                                                                                                                                                                                                                                                                                                                                                                                                                                                                                                                                                                                                                                                                                                                                                                                                                                                                                                                                                                                                                                                                                                                                                                                                                                                                                                                                                                                                                                                                                                                                                                                                                                                                                                                                                                                                      | see above<br>Department of Health Technology and Informatics, The Hong Kong Polytechnic University         | Department of Health Technology and Informatics, The Hong Kong Polytechnic University                                       | A.K.-L.; A.Y.-M.; B.K.-C.; C.T.-M.; Chan; Chau; D.H.-K.; Fung; G.K.-H.; H.-Y.; Ho; J.S.-L.; K.-T.; K.K.-G.; K.S.-C.; K.S.-S.; L.-K.; Lai; Lao; Lee; Leung; Luk; K.; M.C.-Y.; Ng; Que; S.K.-Y.; S.P.; Shum; Siu; T.-L.; T.T.-L.; Tam; To; W.-K.; W.C.; Wong; Wu; Y.W.-M.; Yam; Yau; Yip                                                                                                                                                                                                                   |
| EPI_ISL_416314                                                                                                                                                                                                                                                                                                                                                                                                                                                                                                                                                                                                                                                                                                                                                                                                                                                                                                                                                                                                                                                                                                                                                                                                                                                                                                                                                                                                                                                                                                                                                                                                                                                                                                                                                                                                                                                                                                                                                                                                                                                                                                                                                                                                                                                                                                                                                                                                                                                                                                                                                                                                                                                                                                                                                                                                                                                                                                                                                                                                                                                                                                                                                                                                                                                                                                                                                                                                                                                                                                                                                                                                                                                                                                                                                                                                                                                                                                                                                                                                                                                                                                                                                                                                                                                                                                                                                                                                                                                                                                                                                                                                                                                                                                                                                                                                                                                                                                                                                                                                                                                                                                                                                                                                                                                                                                                                                                                                                                                                                                                                                                                                                                                                                                                                                                                                                                                                                                                                                                                                                                                                                                                                                                                                                                                                                                                                                                                                                                                                                                                                                                                                                                                                                                                                                                                                                                                                                                                                                                                                                                                                                                                                                                                                                                                                                                                                                                                                                                                                                                                                                                                                                                                                                                                                                                                                                                                                                                                                                                                                                                                                                                                                                                                                                                                                                                                                                                                                                                                                                                                                                                                                                                                                                                                                                                                                                                                                                                                                                                                                                                                                                                                                                                                                                                                                                                                                                                                                                                                                                                                                                                                                                                                                                                                                                                                                                                                                                                                                                                                                                                                                                                                                                                                                                                                                                                                                                                                                                                                                                                                                                                                                                                                                                                                                                                                                                                                                                                                                                                                                                                                                                                                                                                                                                                                                                                                                                                                                                                                                                                                                                                                                                                                                                                                                                                                                                                                                                                                                                                                                                                                                                                                                                                                                                                                                                                                                                                                                                                                                                                                                                                                                                                                                                                                                                                                                                                                                                                      | Department of Microbiology, Faculty of Medicine, The Chinese University of Hong Kong, Hong Kong SAR, China | Department of Microbiology, Faculty of Medicine, Chinese University of Hong Kong, Hong Kong SAR, China                      | Paul KS Chan; Zigui Chen                                                                                                                                                                                                                                                                                                                                                                                                                                                                                 |
| EPI_ISL_434560, EPI_ISL_497769, EPI_ISL_497771, EPI_ISL_497773, EPI_ISL_497775, EPI_ISL_497783, EPI_ISL_497784, EPI_ISL_497786, EPI_ISL_497791, EPI_ISL_497796, EPI_ISL_497797, EPI_ISL_497798, EPI_ISL_497799, EPI_ISL_497806, EPI_ISL_497808, EPI_ISL_497810, EPI_ISL_497812, EPI_ISL_497813, EPI_ISL_497818, EPI_ISL_497819, EPI_ISL_497820, EPI_ISL_497821, EPI_ISL_497823, EPI_ISL_497824, EPI_ISL_497826, EPI_ISL_497827, EPI_ISL_497831, EPI_ISL_497832, EPI_ISL_497833, EPI_ISL_497840, EPI_ISL_497845, EPI_ISL_497846, EPI_ISL_497847, EPI_ISL_497848, EPI_ISL_497850, EPI_ISL_497851, EPI_ISL_497856, EPI_ISL_497860, EPI_ISL_497864, EPI_ISL_497865, EPI_ISL_497870, EPI_ISL_516798                                                                                                                                                                                                                                                                                                                                                                                                                                                                                                                                                                                                                                                                                                                                                                                                                                                                                                                                                                                                                                                                                                                                                                                                                                                                                                                                                                                                                                                                                                                                                                                                                                                                                                                                                                                                                                                                                                                                                                                                                                                                                                                                                                                                                                                                                                                                                                                                                                                                                                                                                                                                                                                                                                                                                                                                                                                                                                                                                                                                                                                                                                                                                                                                                                                                                                                                                                                                                                                                                                                                                                                                                                                                                                                                                                                                                                                                                                                                                                                                                                                                                                                                                                                                                                                                                                                                                                                                                                                                                                                                                                                                                                                                                                                                                                                                                                                                                                                                                                                                                                                                                                                                                                                                                                                                                                                                                                                                                                                                                                                                                                                                                                                                                                                                                                                                                                                                                                                                                                                                                                                                                                                                                                                                                                                                                                                                                                                                                                                                                                                                                                                                                                                                                                                                                                                                                                                                                                                                                                                                                                                                                                                                                                                                                                                                                                                                                                                                                                                                                                                                                                                                                                                                                                                                                                                                                                                                                                                                                                                                                                                                                                                                                                                                                                                                                                                                                                                                                                                                                                                                                                                                                                                                                                                                                                                                                                                                                                                                                                                                                                                                                                                                                                                                                                                                                                                                                                                                                                                                                                                                                                                                                                                                                                                                                                                                                                                                                                                                                                                                                                                                                                                                                                                                                                                                                                                                                                                                                                                                                                                                                                                                                                                                                                                                                                                                                                                                                                                                                                                                                                                                                                                                                                                                                                                                                                                                                                                                                                                                                                                                                                                                                                                                                                                                                                                                                                                                                                                                                                                                                                                                                                                                                                                                                      | see above<br>Department of Microbiology, The University of Hong Kong                                       | Department of Microbiology, The University of Hong Kong                                                                     | A.C.P.; Chan; Fung; Fung, J.; H.K.H.; He, Z.; K.S.C. and Woo; K.S.M.; Kelvin K.W. To; Kwok-Yung Yuen; Lau; Li; Luk; P.C.Y.; S.K.P.; T.T.Y.; Wong; Zhu, L                                                                                                                                                                                                                                                                                                                                                 |
| EPI_ISL_417176, EPI_ISL_417178, EPI_ISL_419217, EPI_ISL_419222                                                                                                                                                                                                                                                                                                                                                                                                                                                                                                                                                                                                                                                                                                                                                                                                                                                                                                                                                                                                                                                                                                                                                                                                                                                                                                                                                                                                                                                                                                                                                                                                                                                                                                                                                                                                                                                                                                                                                                                                                                                                                                                                                                                                                                                                                                                                                                                                                                                                                                                                                                                                                                                                                                                                                                                                                                                                                                                                                                                                                                                                                                                                                                                                                                                                                                                                                                                                                                                                                                                                                                                                                                                                                                                                                                                                                                                                                                                                                                                                                                                                                                                                                                                                                                                                                                                                                                                                                                                                                                                                                                                                                                                                                                                                                                                                                                                                                                                                                                                                                                                                                                                                                                                                                                                                                                                                                                                                                                                                                                                                                                                                                                                                                                                                                                                                                                                                                                                                                                                                                                                                                                                                                                                                                                                                                                                                                                                                                                                                                                                                                                                                                                                                                                                                                                                                                                                                                                                                                                                                                                                                                                                                                                                                                                                                                                                                                                                                                                                                                                                                                                                                                                                                                                                                                                                                                                                                                                                                                                                                                                                                                                                                                                                                                                                                                                                                                                                                                                                                                                                                                                                                                                                                                                                                                                                                                                                                                                                                                                                                                                                                                                                                                                                                                                                                                                                                                                                                                                                                                                                                                                                                                                                                                                                                                                                                                                                                                                                                                                                                                                                                                                                                                                                                                                                                                                                                                                                                                                                                                                                                                                                                                                                                                                                                                                                                                                                                                                                                                                                                                                                                                                                                                                                                                                                                                                                                                                                                                                                                                                                                                                                                                                                                                                                                                                                                                                                                                                                                                                                                                                                                                                                                                                                                                                                                                                                                                                                                                                                                                                                                                                                                                                                                                                                                                                                                                                                      | Department of Pathology, Princess Margaret Hospital                                                        | Department of Health Technology and Informatics, Faculty of Health and Social Science, The Hong Kong Polytechnic University | Alan Ka-Lun WU; Alex Yat-Man HO; Barry Kin-Chung WONG; David Ho-Keung SHUM; Eugene Yuk-Keung TSO; Gilman Kit-Hang SIU; Hiu-Yin LAO; Kam-Tong YIP; Kam-Tong Yip; Kenneth Siu-Sing LEUNG; Kingsley King-Gee TAM; Kit-Man SIN; Kitty Sau-Chun FUNG; Kwok-Cheung LUNG; Lam-Kwong LEE; Man-Chun CHAN; Ming-Pan CHOI; Miranda Chong-Yee YAU; Raymond Wai-To LIU; Sandy Ka-Yee CHAU; Shea Ping YIP; Tak-Lun QUE; Timothy Ting-Leung NG; Wai-Shing LEUNG; Wing Cheong YAM; Wing-Kin TO; Yuk-Yung NG              |
| EPI_ISL_417181, EPI_ISL_417185, EPI_ISL_419221                                                                                                                                                                                                                                                                                                                                                                                                                                                                                                                                                                                                                                                                                                                                                                                                                                                                                                                                                                                                                                                                                                                                                                                                                                                                                                                                                                                                                                                                                                                                                                                                                                                                                                                                                                                                                                                                                                                                                                                                                                                                                                                                                                                                                                                                                                                                                                                                                                                                                                                                                                                                                                                                                                                                                                                                                                                                                                                                                                                                                                                                                                                                                                                                                                                                                                                                                                                                                                                                                                                                                                                                                                                                                                                                                                                                                                                                                                                                                                                                                                                                                                                                                                                                                                                                                                                                                                                                                                                                                                                                                                                                                                                                                                                                                                                                                                                                                                                                                                                                                                                                                                                                                                                                                                                                                                                                                                                                                                                                                                                                                                                                                                                                                                                                                                                                                                                                                                                                                                                                                                                                                                                                                                                                                                                                                                                                                                                                                                                                                                                                                                                                                                                                                                                                                                                                                                                                                                                                                                                                                                                                                                                                                                                                                                                                                                                                                                                                                                                                                                                                                                                                                                                                                                                                                                                                                                                                                                                                                                                                                                                                                                                                                                                                                                                                                                                                                                                                                                                                                                                                                                                                                                                                                                                                                                                                                                                                                                                                                                                                                                                                                                                                                                                                                                                                                                                                                                                                                                                                                                                                                                                                                                                                                                                                                                                                                                                                                                                                                                                                                                                                                                                                                                                                                                                                                                                                                                                                                                                                                                                                                                                                                                                                                                                                                                                                                                                                                                                                                                                                                                                                                                                                                                                                                                                                                                                                                                                                                                                                                                                                                                                                                                                                                                                                                                                                                                                                                                                                                                                                                                                                                                                                                                                                                                                                                                                                                                                                                                                                                                                                                                                                                                                                                                                                                                                                                                                                      | Department of Pathology, United Christian Hospital                                                         | Department of Health Technology and Informatics, Faculty of Health and Social Science, The Hong Kong Polytechnic University | Alan Ka-Lun WU; Alex Yat-Man HO; Barry Kin-Chung WONG; David Ho-Keung SHUM; Eugene Yuk-Keung TSO; Gilman Kit-Hang SIU; Hiu-Yin LAO; Kam-Tong YIP; Kam-Tong Yip; Kenneth Siu-Sing LEUNG; Kingsley King-Gee TAM; Kit-Man SIN; Kitty Sau-Chun FUNG; Kwok-Cheung LUNG; Lam-Kwong LEE; Man-Chun CHAN; Ming-Pan CHOI; Miranda Chong-Yee YAU; Raymond Wai-To LIU; Sandy Ka-Yee CHAU; Shea Ping YIP; Tak-Lun QUE; Tak-Lun Que; Timothy Ting-Leung NG; Wai-Shing LEUNG; Wing Cheong YAM; Wing-Kin TO; Yuk-Yung NG |
| EPI_ISL_412028, EPI_ISL_412030                                                                                                                                                                                                                                                                                                                                                                                                                                                                                                                                                                                                                                                                                                                                                                                                                                                                                                                                                                                                                                                                                                                                                                                                                                                                                                                                                                                                                                                                                                                                                                                                                                                                                                                                                                                                                                                                                                                                                                                                                                                                                                                                                                                                                                                                                                                                                                                                                                                                                                                                                                                                                                                                                                                                                                                                                                                                                                                                                                                                                                                                                                                                                                                                                                                                                                                                                                                                                                                                                                                                                                                                                                                                                                                                                                                                                                                                                                                                                                                                                                                                                                                                                                                                                                                                                                                                                                                                                                                                                                                                                                                                                                                                                                                                                                                                                                                                                                                                                                                                                                                                                                                                                                                                                                                                                                                                                                                                                                                                                                                                                                                                                                                                                                                                                                                                                                                                                                                                                                                                                                                                                                                                                                                                                                                                                                                                                                                                                                                                                                                                                                                                                                                                                                                                                                                                                                                                                                                                                                                                                                                                                                                                                                                                                                                                                                                                                                                                                                                                                                                                                                                                                                                                                                                                                                                                                                                                                                                                                                                                                                                                                                                                                                                                                                                                                                                                                                                                                                                                                                                                                                                                                                                                                                                                                                                                                                                                                                                                                                                                                                                                                                                                                                                                                                                                                                                                                                                                                                                                                                                                                                                                                                                                                                                                                                                                                                                                                                                                                                                                                                                                                                                                                                                                                                                                                                                                                                                                                                                                                                                                                                                                                                                                                                                                                                                                                                                                                                                                                                                                                                                                                                                                                                                                                                                                                                                                                                                                                                                                                                                                                                                                                                                                                                                                                                                                                                                                                                                                                                                                                                                                                                                                                                                                                                                                                                                                                                                                                                                                                                                                                                                                                                                                                                                                                                                                                                                                                      | Hong Kong Department of Health                                                                             | School of Public Health, The University of Hong Kong                                                                        | Daniel K.W. Chu; Dominic N.C. Tsang; Leo L.M. Poon; Malik Peiris                                                                                                                                                                                                                                                                                                                                                                                                                                         |
| EPI_ISL_414517, EPI_ISL_414519, EPI_ISL_414527, EPI_ISL_414528, EPI_ISL_414569, EPI_ISL_414571, EPI_ISL_414572, EPI_ISL_414573, EPI_ISL_414574, EPI_ISL_414575, EPI_ISL_414576, EPI_ISL_414577, EPI_ISL_414578, EPI_ISL_414579, EPI_ISL_414580, EPI_ISL_414581, EPI_ISL_414582, EPI_ISL_414583, EPI_ISL_414584, EPI_ISL_414585, EPI_ISL_414586, EPI_ISL_414587, EPI_ISL_414588, EPI_ISL_414589, EPI_ISL_414590, EPI_ISL_414591, EPI_ISL_414592, EPI_ISL_414593, EPI_ISL_414594, EPI_ISL_414595, EPI_ISL_414596, EPI_ISL_414597, EPI_ISL_414598, EPI_ISL_414599, EPI_ISL_414600, EPI_ISL_414601, EPI_ISL_414602, EPI_ISL_414603, EPI_ISL_414604, EPI_ISL_414605, EPI_ISL_414606, EPI_ISL_414607, EPI_ISL_414608, EPI_ISL_414609, EPI_ISL_414610, EPI_ISL_414611, EPI_ISL_414612, EPI_ISL_414613, EPI_ISL_414614, EPI_ISL_414615, EPI_ISL_414616, EPI_ISL_414617, EPI_ISL_414618, EPI_ISL_414619, EPI_ISL_414620, EPI_ISL_414621, EPI_ISL_414622, EPI_ISL_414623, EPI_ISL_414624, EPI_ISL_414625, EPI_ISL_414626, EPI_ISL_414627, EPI_ISL_414628, EPI_ISL_414629, EPI_ISL_414630, EPI_ISL_414631, EPI_ISL_414632, EPI_ISL_414633, EPI_ISL_414634, EPI_ISL_414635, EPI_ISL_414636, EPI_ISL_414637, EPI_ISL_414638, EPI_ISL_414639, EPI_ISL_414640, EPI_ISL_414641, EPI_ISL_414642, EPI_ISL_414643, EPI_ISL_414644, EPI_ISL_414645, EPI_ISL_414646, EPI_ISL_414647, EPI_ISL_414648, EPI_ISL_414649, EPI_ISL_414650, EPI_ISL_414651, EPI_ISL_414652, EPI_ISL_414653, EPI_ISL_414654, EPI_ISL_414655, EPI_ISL_414656, EPI_ISL_414657, EPI_ISL_414658, EPI_ISL_414659, EPI_ISL_414660, EPI_ISL_414661, EPI_ISL_414662, EPI_ISL_414663, EPI_ISL_414664, EPI_ISL_414665, EPI_ISL_414666, EPI_ISL_414667, EPI_ISL_414668, EPI_ISL_414669, EPI_ISL_414670, EPI_ISL_414671, EPI_ISL_414672, EPI_ISL_414673, EPI_ISL_414674, EPI_ISL_414675, EPI_ISL_414676, EPI_ISL_414677, EPI_ISL_414678, EPI_ISL_414679, EPI_ISL_414680, EPI_ISL_414681, EPI_ISL_414682, EPI_ISL_414683, EPI_ISL_414684, EPI_ISL_414685, EPI_ISL_414686, EPI_ISL_414687, EPI_ISL_414688, EPI_ISL_414689, EPI_ISL_414690, EPI_ISL_414691, EPI_ISL_414692, EPI_ISL_414693, EPI_ISL_414694, EPI_ISL_414695, EPI_ISL_414696, EPI_ISL_414697, EPI_ISL_414698, EPI_ISL_414699, EPI_ISL_414700, EPI_ISL_414701, EPI_ISL_414702, EPI_ISL_414703, EPI_ISL_414704, EPI_ISL_414705, EPI_ISL_414706, EPI_ISL_414707, EPI_ISL_414708, EPI_ISL_414709, EPI_ISL_414710, EPI_ISL_414711, EPI_ISL_414712, EPI_ISL_414713, EPI_ISL_414714, EPI_ISL_414715, EPI_ISL_414716, EPI_ISL_414717, EPI_ISL_414718, EPI_ISL_414719, EPI_ISL_414720, EPI_ISL_414721, EPI_ISL_414722, EPI_ISL_414723, EPI_ISL_414724, EPI_ISL_414725, EPI_ISL_414726, EPI_ISL_414727, EPI_ISL_414728, EPI_ISL_414729, EPI_ISL_414730, EPI_ISL_414731, EPI_ISL_414732, EPI_ISL_414733, EPI_ISL_414734, EPI_ISL_414735, EPI_ISL_414736, EPI_ISL_414737, EPI_ISL_414738, EPI_ISL_414739, EPI_ISL_414740, EPI_ISL_414741, EPI_ISL_414742, EPI_ISL_414743, EPI_ISL_414744, EPI_ISL_414745, EPI_ISL_414746, EPI_ISL_414747, EPI_ISL_414748, EPI_ISL_414749, EPI_ISL_414750, EPI_ISL_414751, EPI_ISL_414752, EPI_ISL_414753, EPI_ISL_414754, EPI_ISL_414755, EPI_ISL_414756, EPI_ISL_414757, EPI_ISL_414758, EPI_ISL_414759, EPI_ISL_414760, EPI_ISL_414761, EPI_ISL_414762, EPI_ISL_414763, EPI_ISL_414764, EPI_ISL_414765, EPI_ISL_414766, EPI_ISL_414767, EPI_ISL_414768, EPI_ISL_414769, EPI_ISL_414770, EPI_ISL_414771, EPI_ISL_414772, EPI_ISL_414773, EPI_ISL_414774, EPI_ISL_414775, EPI_ISL_414776, EPI_ISL_414777, EPI_ISL_414778, EPI_ISL_414779, EPI_ISL_414780, EPI_ISL_414781, EPI_ISL_414782, EPI_ISL_414783, EPI_ISL_414784, EPI_ISL_414785, EPI_ISL_414786, EPI_ISL_414787, EPI_ISL_414788, EPI_ISL_414789, EPI_ISL_414790, EPI_ISL_414791, EPI_ISL_414792, EPI_ISL_414793, EPI_ISL_414794, EPI_ISL_414795, EPI_ISL_414796, EPI_ISL_414797, EPI_ISL_414798, EPI_ISL_414799, EPI_ISL_414800, EPI_ISL_414801, EPI_ISL_414802, EPI_ISL_414803, EPI_ISL_414804, EPI_ISL_414805, EPI_ISL_414806, EPI_ISL_414807, EPI_ISL_414808, EPI_ISL_414809, EPI_ISL_414810, EPI_ISL_414811, EPI_ISL_414812, EPI_ISL_414813, EPI_ISL_414814, EPI_ISL_414815, EPI_ISL_414816, EPI_ISL_414817, EPI_ISL_414818, EPI_ISL_414819, EPI_ISL_414820, EPI_ISL_414821, EPI_ISL_414822, EPI_ISL_414823, EPI_ISL_414824, EPI_ISL_414825, EPI_ISL_414826, EPI_ISL_414827, EPI_ISL_414828, EPI_ISL_414829, EPI_ISL_414830, EPI_ISL_414831, EPI_ISL_414832, EPI_ISL_414833, EPI_ISL_414834, EPI_ISL_414835, EPI_ISL_414836, EPI_ISL_414837, EPI_ISL_414838, EPI_ISL_414839, EPI_ISL_414840, EPI_ISL_414841, EPI_ISL_414842, EPI_ISL_414843, EPI_ISL_414844, EPI_ISL_414845, EPI_ISL_414846, EPI_ISL_414847, EPI_ISL_414848, EPI_ISL_414849, EPI_ISL_414850, EPI_ISL_414851, EPI_ISL_414852, EPI_ISL_414853, EPI_ISL_414854, EPI_ISL_414855, EPI_ISL_414856, EPI_ISL_414857, EPI_ISL_414858, EPI_ISL_414859, EPI_ISL_414860, EPI_ISL_414861, EPI_ISL_414862, EPI_ISL_414863, EPI_ISL_414864, EPI_ISL_414865, EPI_ISL_414866, EPI_ISL_414867, EPI_ISL_414868, EPI_ISL_414869, EPI_ISL_414870, EPI_ISL_414871, EPI_ISL_414872, EPI_ISL_414873, EPI_ISL_414874, EPI_ISL_414875, EPI_ISL_414876, EPI_ISL_414877, EPI_ISL_414878, EPI_ISL_414879, EPI_ISL_414880, EPI_ISL_414881, EPI_ISL_414882, EPI_ISL_414883, EPI_ISL_414884, EPI_ISL_414885, EPI_ISL_414886, EPI_ISL_414887, EPI_ISL_414888, EPI_ISL_414889, EPI_ISL_414890, EPI_ISL_414891, EPI_ISL_414892, EPI_ISL_414893, EPI_ISL_414894, EPI_ISL_414895, EPI_ISL_414896, EPI_ISL_414897, EPI_ISL_414898, EPI_ISL_414899, EPI_ISL_414900, EPI_ISL_414901, EPI_ISL_414902, EPI_ISL_414903, EPI_ISL_414904, EPI_ISL_414905, EPI_ISL_414906, EPI_ISL_414907, EPI_ISL_414908, EPI_ISL_414909, EPI_ISL_414910, EPI_ISL_414911, EPI_ISL_414912, EPI_ISL_414913, EPI_ISL_414914, EPI_ISL_414915, EPI_ISL_414916, EPI_ISL_414917, EPI_ISL_414918, EPI_ISL_414919, EPI_ISL_414920, EPI_ISL_414921, EPI_ISL_414922, EPI_ISL_414923, EPI_ISL_414924, EPI_ISL_414925, EPI_ISL_414926, EPI_ISL_414927, EPI_ISL_414928, EPI_ISL_414929, EPI_ISL_414930, EPI_ISL_414931, EPI_ISL_414932, EPI_ISL_414933, EPI_ISL_414934, EPI_ISL_414935, EPI_ISL_414936, EPI_ISL_414937, EPI_ISL_414938, EPI_ISL_414939, EPI_ISL_414940, EPI_ISL_414941, EPI_ISL_414942, EPI_ISL_414943, EPI_ISL_414944, EPI_ISL_414945, EPI_ISL_414946, EPI_ISL_414947, EPI_ISL_414948, EPI_ISL_414949, EPI_ISL_414950, EPI_ISL_414951, EPI_ISL_414952, EPI_ISL_414953, EPI_ISL_414954, EPI_ISL_414955, EPI_ISL_414956, EPI_ISL_414957, EPI_ISL_414958, EPI_ISL_414959, EPI_ISL_414960, EPI_ISL_414961, EPI_ISL_414962, EPI_ISL_414963, EPI_ISL_414964, EPI_ISL_414965, EPI_ISL_414966, EPI_ISL_414967, EPI_ISL_414968, EPI_ISL_414969, EPI_ISL_414970, EPI_ISL_414971, EPI_ISL_414972, EPI_ISL_414973, EPI_ISL_414974, EPI_ISL_414975, EPI_ISL_414976, EPI_ISL_414977, EPI_ISL_414978, EPI_ISL_414979, EPI_ISL_414980, EPI_ISL_414981, EPI_ISL_414982, EPI_ISL_414983, EPI_ISL_414984, EPI_ISL_414985, EPI_ISL_414986, EPI_ISL_414987, EPI_ISL_414988, EPI_ISL_414989, EPI_ISL_414990, EPI_ISL_414991, EPI_ISL_414992, EPI_ISL_414993, EPI_ISL_414994, EPI_ISL_414995, EPI_ISL_414996, EPI_ISL_414997, EPI_ISL_414998, EPI_ISL_414999, EPI_ISL_415000, EPI_ISL_415001, EPI_ISL_415002, EPI_ISL_415003, EPI_ISL_415004, EPI_ISL_415005, EPI_ISL_415006, EPI_ISL_415007, EPI_ISL_415008, EPI_ISL_415009, EPI_ISL_415010, EPI_ISL_415011, EPI_ISL_415012, EPI_ISL_415013, EPI_ISL_415014, EPI_ISL_415015, EPI_ISL_415016, EPI_ISL_415017, EPI_ISL_415018, EPI_ISL_415019, EPI_ISL_415020, EPI_ISL_415021, EPI_ISL_415022, EPI_ISL_415023, EPI_ISL_415024, EPI_ISL_415025, EPI_ISL_415026, EPI_ISL_415027, EPI_ISL_415028, EPI_ISL_415029, EPI_ISL_415030, EPI_ISL_415031, EPI_ISL_415032, EPI_ISL_415033, EPI_ISL_415034, EPI_ISL_415035, EPI_ISL_415036, EPI_ISL_415037, EPI_ISL_415038, EPI_ISL_415039, EPI_ISL_415040, EPI_ISL_415041, EPI_ISL_415042, EPI_ISL_415043, EPI_ISL_415044, EPI_ISL_415045, EPI_ISL_415046, EPI_ISL_415047, EPI_ISL_415048, EPI_ISL_415049, EPI_ISL_415050, EPI_ISL_415051, EPI_ISL_415052, EPI_ISL_415053, EPI_ISL_415054, EPI_ISL_415055, EPI_ISL_415056, EPI_ISL_415057, EPI_ISL_415058, EPI_ISL_415059, EPI_ISL_415060, EPI_ISL_415061, EPI_ISL_415062, EPI_ISL_415063, EPI_ISL_415064, EPI_ISL_415065, EPI_ISL_415066, EPI_ISL_415067, EPI_ISL_415068, EPI_ISL_415069, EPI_ISL_415070, EPI_ISL_415071, EPI_ISL_415072, EPI_ISL_415073, EPI_ISL_415074, EPI_ISL_415075, EPI_ISL_415076, EPI_ISL_415077, EPI_ISL_415078, EPI_ISL_415079, EPI_ISL_415080, EPI_ISL_415081, EPI_ISL_415082, EPI_ISL_415083, EPI_ISL_415084, EPI_ISL_415085, EPI_ISL_415086, EPI_ISL_415087, EPI_ISL_415088, EPI_ISL_415089, EPI_ISL_415090, EPI_ISL_415091, EPI_ISL_415092, EPI_ISL_415093, EPI_ISL_415094, EPI_ISL_415095, EPI_ISL_415096, EPI_ISL_415097, EPI_ISL_415098, EPI_ISL_415099, EPI_ISL_415100, EPI_ISL_415101, EPI_ISL_415102, EPI_ISL_415103, EPI_ISL_415104, EPI_ISL_415105, EPI_ISL_415106, EPI_ISL_415107, EPI_ISL_415108, EPI_ISL_415109, EPI_ISL_415110, EPI_ISL_415111, EPI_ISL_415112, EPI_ISL_415113, EPI_ISL_415114, EPI_ISL_415115, EPI_ISL_415116, EPI_ISL_415117, EPI_ISL_415118, EPI_ISL_415119, EPI_ISL_415120, EPI_ISL_415121, EPI_ISL_415122, EPI_ISL_415123, EPI_ISL_415124, EPI_ISL_415125, EPI_ISL_415126, EPI_ISL_415127, EPI_ISL_415128, EPI_ISL_415129, EPI_ISL_415130, EPI_ISL_415131, EPI_ISL_415132, EPI_ISL_415133, EPI_ISL_415134, EPI_ISL_415135, EPI_ISL_415136, EPI_ISL_415137, EPI_ISL_415138, EPI_ISL_415139, EPI_ISL_415140, EPI_ISL_415141, EPI_ISL_415142, EPI_ISL_415143, EPI_ISL_415144, EPI_ISL_415145, EPI_ISL_415146, EPI_ISL_415147, EPI_ISL_415148, EPI_ISL_415149, EPI_ISL_415150, EPI_ISL_415151, EPI_ISL_415152, EPI_ISL_415153, EPI_ISL_415154, EPI_ISL_415155, EPI_ISL_415156, EPI_ISL_415157, EPI_ISL_415158, EPI_ISL_415159, EPI_ISL_415160, EPI_ISL_415161, EPI_ISL_415162, EPI_ISL_415163, EPI_ISL_415164, EPI_ISL_415165, EPI_ISL_415166, EPI_ISL_415167, EPI_ISL_415168, EPI_ISL_415169, EPI_ISL_415170, EPI_ISL_415171, EPI_ISL_415172, EPI_ISL_415173, EPI_ISL_415174, EPI_ISL_415175, EPI_ISL_415176, EPI_ISL_415177, EPI_ISL_415178, EPI_ISL_415179, EPI_ISL_415180, EPI_ISL_415181, EPI_ISL_415182, EPI_ISL_415183, EPI_ISL_415184, EPI_ISL_415185, EPI_ISL_415186, EPI_ISL_415187, EPI_ISL_415188, EPI_ISL_415189, EPI_ISL_415190, EPI_ISL_415191, EPI_ISL_415192, EPI_ISL_415193, EPI_ISL_415194, EPI_ISL_415195, EPI_ISL_415196, EPI_ISL_415197, EPI_ISL_415198, EPI_ISL_415199, EPI_ISL_415200, EPI_ISL_415201, EPI_ISL_415202, EPI_ISL_415203, EPI_ISL_415204, EPI_ISL_415205, EPI_ISL_415206, EPI_ISL_415207, EPI_ISL_415208, EPI_ISL_415209, EPI_ISL_415210, EPI_ISL_415211, EPI_ISL_415212, EPI_ISL_415213, EPI_ISL_415214, EPI_ISL_415215, EPI_ISL_415216, EPI_ISL_415217, EPI_ISL_415218, EPI_ISL_415219, EPI_ISL_415220, EPI_ISL_415221, EPI_ISL_415222, EPI_ISL_415223, EPI_ISL_415224, EPI_ISL_415225, EPI_ISL_415226, EPI_ISL_415227, EPI_ISL_415228, EPI_ISL_415229, EPI_ISL_415230, EPI_ISL_415231, EPI_ISL_415232, EPI_ISL_415233, EPI_ISL_415234, EPI_ISL_415235, EPI_ISL_415236, EPI_ISL_415237, EPI_ISL_415238, EPI_ISL_415239, EPI_ISL_415240, EPI_ISL_415241, EPI_ISL_415242, EPI_ISL_415243, EPI_ISL_415244, EPI_ISL_415245, EPI_ISL_415246, EPI_ISL_415247, EPI_ISL_415248, EPI_ISL_415249, EPI_ISL_415250, EPI_ISL_415251, EPI_ISL_415252, EPI_ISL_415253, EPI_ISL_415254, EPI_ISL_415255, EPI_ISL_415256, EPI_ISL_415257, EPI_ISL_415258, EPI_ISL_415259, EPI_ISL_415260, EPI_ISL_415261, EPI_ISL_415262, EPI_ISL_415263, EPI_ISL_415264, EPI_ISL_415265, EPI_ISL_415266, EPI_ISL_415267, EPI_ISL_415268, EPI_ISL_415269, EPI_ISL_415270, EPI_ISL_415271, EPI_ISL_415272, EPI_ISL_415273, EPI_ISL_415274, EPI_ISL_415275, EPI_ISL_415276, EPI_ISL_415277, EPI_ISL_415278, EPI_ISL_415279, EPI_ISL_415280, EPI_ISL_415281, EPI_ISL_415282, EPI_ISL_415283, EPI_ISL_415284, EPI_ISL_415285, EPI_ISL_415286, EPI_ISL_415287, EPI_ISL_415288, EPI_ISL_415289, EPI_ISL_415290, EPI_ISL_415291, EPI_ISL_415292, EPI_ISL_415293, EPI_ISL_415294, EPI_ISL_415295, EPI_ISL_415296, EPI_ISL_415297, EPI_ISL_415298, EPI_ISL_415299, EPI_ISL_415300, EPI_ISL_415301, EPI_ISL_415302, EPI_ISL_415303, EPI_ISL_415304, EPI_ISL_415305, EPI_ISL_415306, EPI_ISL_415307, EPI_ISL_415308, EPI_ISL_415309, EPI_ISL_415310, EPI_ISL_415311, EPI_ISL_415312, EPI_ISL_415313, EPI_ISL_415314, EPI_ISL_415315, EPI_ISL_415316, EPI_ISL_415317, EPI_ISL_415318, EPI_ISL_415319, EPI_ISL_415320, EPI_ISL_415321, EPI_ISL_415322, EPI_ISL_415323, EPI_ISL_415324, EPI_ISL_415325, EPI_ISL_415326, EPI_ISL_415327, EPI_ISL_415328, EPI_ISL_415329, EPI_ISL_415330, EPI_ISL_415331, EPI_ISL_415332, EPI_ISL_415333, EPI_ISL_415334, EPI_ISL_415335, EPI_ISL_415336, EPI_ISL_415337, EPI_ISL_415338, EPI_ISL_415339, EPI_ISL_415340, EPI |                                                                                                            |                                                                                                                             |                                                                                                                                                                                                                                                                                                                                                                                                                                                                                                          |
